1           **Modelling the depth-dependent VASO and BOLD**  
2           **responses in human primary visual cortex**

3  
4  
5   Atena Akbari<sup>1</sup>, Saskia Bollmann<sup>1</sup>, Tonima S Ali<sup>2</sup>, and Markus Barth<sup>1, 3, 4</sup>

6           <sup>1</sup>Centre for Advanced Imaging, University of Queensland, Brisbane, Australia

7           <sup>2</sup>School of Biomedical Engineering, The University of Sydney, Sydney, Australia

8           <sup>3</sup>ARC Training Centre for Innovation in Biomedical Imaging Technology, The University of  
9           Queensland, Brisbane, Australia

10          <sup>4</sup>School of Information Technology and Electrical Engineering, The University of Queensland,  
11          Brisbane, Queensland, Australia

12

13 **Abstract**

14 Functional magnetic resonance imaging (fMRI) using a blood-oxygenation-  
15 level-dependent (BOLD) contrast is a common method for studying human brain  
16 function non-invasively. Gradient-echo (GRE) BOLD is highly sensitive to the blood  
17 oxygenation change in blood vessels; however, the spatial signal specificity can be  
18 degraded due to signal leakage from activated lower layers to superficial layers in  
19 depth-dependent (also called laminar or layer-specific) fMRI. Alternatively,  
20 physiological variables such as cerebral blood volume using the VAScular-Space-  
21 Occupancy (VASO) contrast have shown higher spatial specificity compared to BOLD.  
22 To better understand the physiological mechanisms such as blood volume and  
23 oxygenation changes and to interpret the measured depth-dependent responses,  
24 models are needed which reflect vascular properties at this scale. For this purpose,  
25 we extended and modified the “cortical vascular model” previously developed to  
26 predict layer-specific BOLD signal changes in human primary visual cortex to also  
27 predict a layer-specific VASO response. To evaluate the model, we compared the  
28 predictions with experimental results of simultaneous VASO and BOLD  
29 measurements in a group of healthy participants. Fitting the model to our experimental  
30 data provided an estimate of CBV change in different vascular compartments upon  
31 neural activity. We found that stimulus-evoked CBV change mainly occurs in small  
32 arterioles, capillaries and intracortical arteries, and that the contribution from venules  
33 and ICVs is small. Our results confirm that VASO is less susceptible to large vessel  
34 effects compared to BOLD, as blood volume changes in intracortical arteries did not  
35 substantially affect the resulting depth-dependent VASO profiles, whereas depth-  
36 dependent BOLD profiles showed a bias towards signal contributions from intracortical  
37 veins.

38

39

40

41 **Keywords**

42 Lamina fMRI, VASO, BOLD, cerebral blood volume, cortical layers, primary visual  
43 cortex, depth-dependent

44

45

## 46 **1 Introduction**

47 High-resolution functional magnetic resonance imaging (fMRI) offers the  
48 potential to measure depth-dependent hemodynamic responses, which can provide  
49 insights into cortical information processing and microcircuits of the human brain  
50 (Douglas and Martin, 2004; Lawrence et al., 2019; Stephan et al., 2019). Numerous  
51 studies have investigated the function of cortical layers using the blood-oxygenation-  
52 level-dependent (BOLD) contrast (Ogawa et al., 1990) in animals and humans (Aitken  
53 et al., 2020; Bollmann and Barth, 2020; Chen et al., 2013; de Hollander et al., 2021;  
54 Goense et al., 2012; Goense and Logothetis, 2006; Koopmans et al., 2010; Polimeni  
55 et al., 2010; Poplawsky et al., 2015; Ress et al., 2007; Self et al., 2017; Silva and  
56 Koretsky, 2002; van Dijk et al., 2020; Vizioli et al., 2020; Yu et al., 2014; Zaretskaya  
57 et al., 2020); for a brief history of the field see also Norris and Polimeni (2019). Despite  
58 the high sensitivity of this technique, it suffers from limited specificity due to signal  
59 leakage in draining veins carrying blood from (activated) lower layers to superficial  
60 layers and further to the pial veins (Duvernoy et al., 1981; Kim et al., 1994; Turner,  
61 2002). This low specificity was the motivation to develop non-BOLD contrast  
62 mechanisms, such as cerebral-blood-volume (CBV) imaging, which is expected to be  
63 predominantly sensitive to hemodynamic responses in the microvasculature (Gagnon  
64 et al., 2015; Jin and Kim, 2006, 2008a; Kim and Kim, 2010, 2011a; Poplawsky et al.,  
65 2015; Silva et al., 2007; Vanzetta et al., 2005; Zhao et al., 2006).

66 A non-invasive method for CBV imaging is vascular-space-occupancy (VASO)  
67 (Lu et al., 2003), which takes advantage of the difference in blood and tissue  $T_1$  to  
68 image the tissue signal while the blood signal is nulled (Huber et al., 2014b; Lu et al.,  
69 2003). Since the development of this contrast and its translation to 7 Tesla (T), several  
70 studies in animals and humans have been conducted in the areas of method  
71 development (Beckett et al., 2019; Chai et al., 2019; Huber et al., 2015; Huber et al.,  
72 2016; Yu et al., 2014), analysis strategies (Huber et al., 2021; Polimeni et al., 2018),  
73 and applications to cognitive neuroscience (Finn et al., 2019; Huber et al., 2014a;  
74 Huber et al., 2017a; Kashyap et al., 2018; Oliveira et al., 2021b; Van Kerkoerle et al.,  
75 2017). However, to interpret the experimental results and account for both neural and  
76 vascular contributions to the fMRI signal, detailed models are required (Buxton et al.,  
77 2004). Several studies have modelled the BOLD response for both low- and high-  
78 resolution acquisitions (Baez-Yanez et al., 2020; Buxton et al., 2004; Buxton et al.,

79 1998; Gagnon et al., 2015; Havlicek and Uludağ, 2020; Heinzle et al., 2016;  
80 Markuerkiaga et al., 2016; Uludağ et al., 2009). Recently, Genois et al. (2021)  
81 modelled BOLD and VASO signals using a vascular anatomical network (VAN) model  
82 (Boas et al., 2008) of the rat brain to investigate intra- and extra-vascular contributions  
83 to the BOLD signal and BOLD contribution to the VASO signal. However, no  
84 simulations of depth-dependent BOLD or VASO signals were provided in this study.  
85 Given the potential of VASO imaging for layer fMRI, we set out to model the depth-  
86 dependent VASO signal changes in human primary visual cortex (V1) employing a  
87 detailed model of the underlying macro- and micro-vasculature (Markuerkiaga et al.,  
88 2016). In this work, we extended and modified the “cortical vascular model”  
89 (Markuerkiaga et al., 2016) to simulate VASO responses in addition to BOLD  
90 responses at the laminar level. This model is based on histological observations in  
91 macaque primary visual cortex and considers various vascular features, such as  
92 vessel diameter, length, density, and distribution to simulate intra- and extra-vascular  
93 BOLD and VASO signals across cortical layers. We added intra-cortical (diving)  
94 arteries (ICAs) to the modelled region, as it is hypothesized that these play a role in  
95 the functional VASO response based on previous observations (Gagnon et al., 2015;  
96 Vanzetta et al., 2005). We also modified the artery to vein ratio defined in the model  
97 such that it is applicable to the human brain (Cassot et al., 2009; Schmid et al., 2019).  
98 To fit the predictions of the now extended model to experimental data, we performed  
99 simultaneous BOLD and VASO imaging in a group of healthy participants with sub-  
100 millimetre resolution at 7T. The model fitting then provided estimates of CBV and  
101 oxygenation changes in micro-vascular (arterioles, capillaries, venules) and macro-  
102 vascular (ICAs and intra-cortical veins (ICVs)) compartments at each cortical depth.  
103 Furthermore, we investigated the sensitivity of both VASO and BOLD contrasts to  
104 changes in the underlying physiological parameters, i.e., CBV and oxygenation.

105 To the best of our knowledge, this is the first study reporting depth-dependent  
106 experimental VASO profiles in the human primary visual cortex and the first depth-  
107 dependent VASO simulation study investigating the underlying physiological mechanism,  
108 such as the effect of baseline CBV on the resulting depth-dependent BOLD and VASO  
109 profiles. In the following sections, we briefly summarize the general structure of the  
110 previously developed cortical vascular model (2.1 and 2.2), and then describe the  
111 applied changes to simulate the VASO and BOLD responses (2.3 and 2.4).

## 112 **2 Theory and Simulations**

### 113 **2.1 The cortical vascular model**

114       The cortical vascular model developed by Markuerkiaga et al. (2016) simulates  
115 the steady-state BOLD response in a depth-dependent manner in human primary  
116 visual cortex. The model divides the brain vasculature into two groups: (i) the  
117 microvasculature forming a network of tangled, randomly oriented arterioles,  
118 capillaries, and venules called the *laminar network*, where the vessel distribution and  
119 blood volume varies as a function of depth, and (ii) The macrovasculature in the form  
120 of intra-cortical veins (ICVs) that drain the microvasculature towards the cortical  
121 surface. In the original version of the cortical vascular model (Markuerkiaga et al.,  
122 2016), the vessel distribution in the laminar network was 21% arterioles, 36%  
123 capillaries, and 43% venules. However, these values are based on the rat brain (Boas  
124 et al., 2008), and the artery-to-vein ratio should be reversed for the human brain  
125 (Cassot et al., 2009; Schmid et al., 2019). Thus, we assumed the following vessel  
126 density in the laminar network: 43% arterioles, 36% capillaries, and 21% venules. The  
127 model investigates the effect of the ascending veins on the BOLD signal by calculating  
128 the diameter, blood velocity, and mass flux of the ICVs in each layer. To simulate the  
129 VASO response, we added diving arteries to the modelled region, as several studies  
130 have shown that dilation mainly occurs in arteries and arterioles (Gagnon et al., 2015;  
131 Kim and Kim, 2011a; Vanzetta et al., 2005). To do so, a vascular unit centered on two  
132 adjacent principal veins (V3 and V4), surrounded by an arterial ring is modelled in this  
133 work with an artery-to-vein ratio of 2-to-1 (Cassot et al., 2009; Lauwers et al., 2008;  
134 Schmid et al., 2019). The diameter of this venous unit is around 0.75-1 mm.  
135 Considering the 2.5 mm thickness of V1 (Fischl and Dale, 2000), we simulated ten  
136 voxels with the size of  $0.75 \times 0.75 \times 0.25 \text{ mm}^3$ , i.e. signal change of one venous unit at  
137 ten cortical depths. Figure 1A shows a schematic of the modelled intra-cortical arteries  
138 and veins following Duvernoy et al. (1981) in which vessels are categorized based on  
139 their diameter and penetration depth.

140       The diameter of the intra-cortical vessels in each depth is calculated following  
141 the steps described in Markuerkiaga et al. (2016). In brief, based on the mass  
142 conservation law, the incoming mass flux ( $p$ ) to the arteries should be equal to the  
143 outgoing flux from the veins in the modelled region at steady state. Similarly, the mass

144 flux from each depth is the mass flux from within the laminar network plus the mass  
145 flux in the macrovasculature from the previous layer. In general, the mass flux through  
146 vessels can be calculated as:

$$p = r^2 \cdot v, \quad \text{Equation 1}$$

147 where  $r$  is the vessel radius and  $v$  is the blood velocity. We can rewrite this as:

$$p = \frac{d^3}{4} \cdot \alpha, \quad \text{Equation 2}$$

148 assuming a linear relationship between vessel diameter  $d$  and blood velocity (Zweifach  
149 and Lipowsky, 1977):

$$\alpha = \frac{v}{d}. \quad \text{Equation 3}$$

150 The mass flux  $p$  through a single capillary is calculated assuming  $d = 8 \mu\text{m}$  and  
151  $v = 1.6 \text{ mm/s}$  (Boas et al., 2008; Zweifach and Lipowsky, 1977). Then,  $p$  through  
152 ICVs and ICAs present in each layer is calculated starting from the layer closest to the  
153 white-matter (WM) border based on the number of capillaries in that layer:

$$p_{\text{ICVs}} = \frac{N_{\text{cap}}}{N_{\text{ICVs}}} \cdot p_{\text{cap}}. \quad \text{Equation 4}$$

154 For the rest of the layers,  $p$  in each layer is the summation of the mass flux  
155 within that layer and the mass flux from the previous layer(s). The same calculation  
156 for ICVs applies for ICAs, but with twice the number of arteries (Schmid et al., 2019).  
157 Note that for this steady-state model, the direction of flow does not play a role when  
158 calculating the mass flux at each depth. The only relevant considerations are the mass  
159 conservation law, i.e., mass flux entering a layer should be equal to the mass flux that  
160 exits this layer, and the general layout of the model, i.e., blood from deeper layers  
161 flows through upper layers. Thus, the mass flux in each layer is equal to the additional  
162 mass flux ( $p_{\text{cap}}$ ) from the laminar network in that layer plus the mass flux in the  
163 preceding layers. Therefore, the calculation can be done in both bottom-up or top-  
164 down directions. The  $\alpha$  values in pre- and post-capillaries compartments were  
165 calculated assuming  $d = 8 \mu\text{m}$  and  $v = 2 \text{ mm/s}$  in post-capillary and  $v = 4 \text{ mm/s}$  in  
166 the pre-capillary segment of the vasculature (Equation 3) (Zweifach and Lipowsky,

167 1977). Then, based on the mass flux for each vessel at each layer, the vessel diameter  
168 and the blood velocity of the macrovasculature can be calculated using Equation 2  
169 and 3. Table 1 shows the estimated diameters of intra-cortical arteries and veins,  
170 which are in line with the values reported in Duvernoy et al. (1981).

171 The baseline blood volume of the laminar network taken from Weber et al.  
172 (2008) was interpolated to the number of voxels being simulated, resulting in 2-2.7%  
173 baseline CBV (Figure 1B). The intracortical baseline CBV is calculated as:

$$CBV_{\text{base}}^{\text{ICAs,ICVs}} = \pi \frac{d^2}{4} / l^2, \quad \text{Equation 5}$$

174 in which  $l$  is the simulated voxel length (0.75 mm) yielding a baseline CBV in ICVs  
175 ranging from 0.2-1.4% and a baseline CBV in ICAs ranging from 0.2-1.2% (Figure 1C).  
176 The average of the total baseline CBV of the modelled vasculature is 3.7 % (Figure  
177 1D), where venous and arterial baseline CBV fractions are 57% and 43% of the total  
178 CBV, respectively. This is comparable to a PET study reporting arterial CBV fractions  
179 of 30 % in humans (An and Lin, 2002; Ito et al., 2005; Ito et al., 2001). This vascular  
180 model is then combined with the MR signal model (see section 2.2).

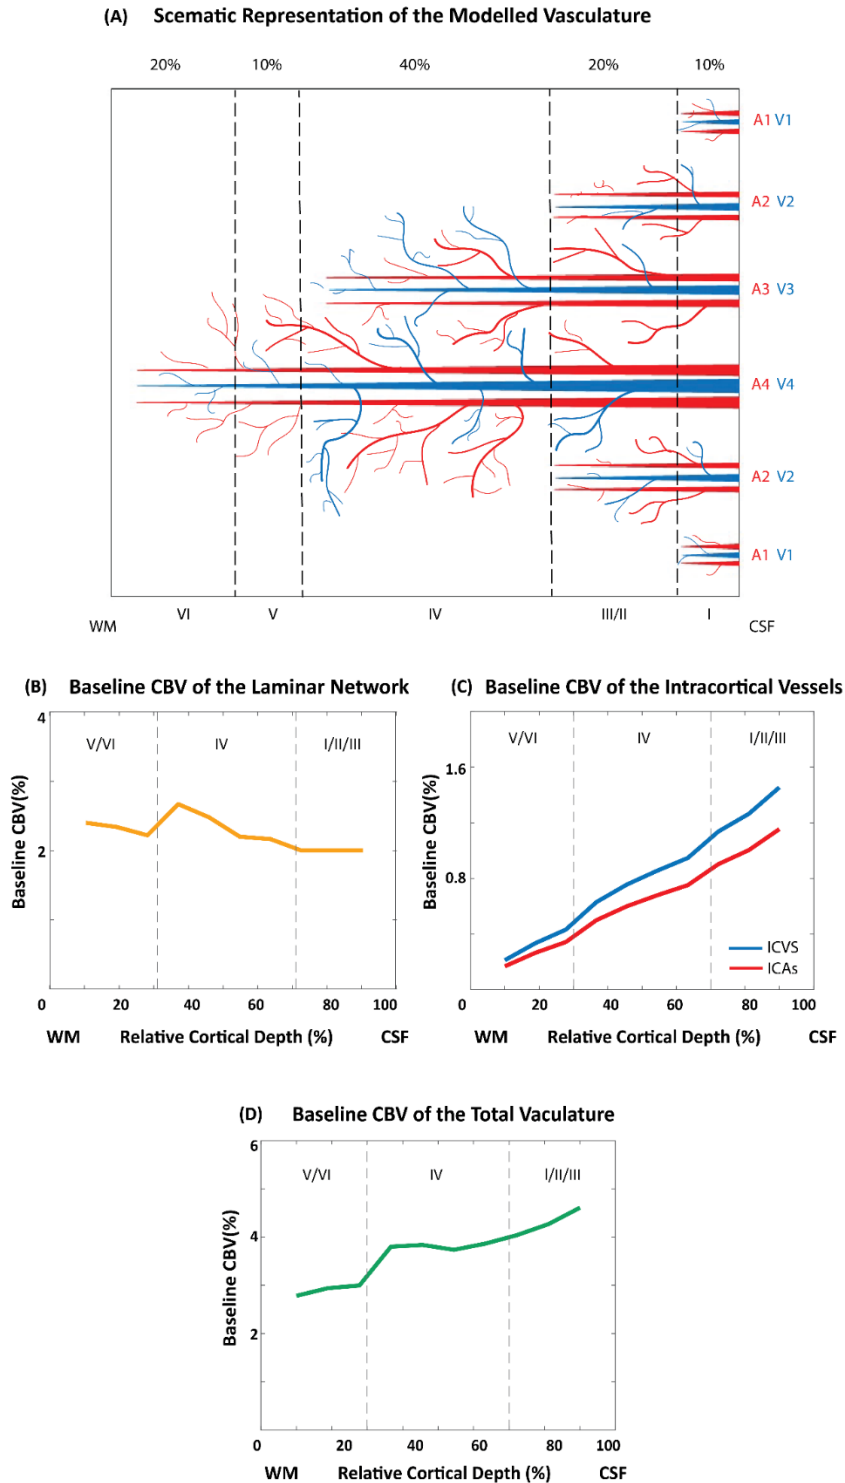

182 Figure 1: Vascular model of intra-cortical vessels and baseline cerebral blood volume of the different  
183 vascular compartments. A) Schematic of the vascular features of the primary visual cortex illustrating  
184 the 2 – 1 artery-to-vein ratio. B) Baseline blood volume of the laminar network (i.e., arterioles, capillaries,  
185 and venules) as a function of cortical depth following Weber et al. (2008). C) Estimated baseline blood  
186 volume of the intra-cortical vessels (ICAs and ICVs). D) Estimated baseline blood volume of the total  
187 vasculature.

188



189 Table 1. The average diameter (in  $\mu\text{m}$ ) of intra-cortical arteries and veins in the modelled vascular unit  
 190 centred on two intermediate-sized veins (V3 and V4) and surrounded by four intermediate-sized arteries  
 191 (two A3 and two A4). For reference, the ICV diameters of group 1 to 4 reported in Duvernoy et al. (1981)  
 192 range from 20 to 65  $\mu\text{m}$ , and the diameter of the corresponding ICAs range from 10 to 40  $\mu\text{m}$ .

| <i>The Average Diameter (<math>\mu\text{m}</math>) of the Intracortical Vessels</i> |           |           |           |           |           |           |           |           |
|-------------------------------------------------------------------------------------|-----------|-----------|-----------|-----------|-----------|-----------|-----------|-----------|
| <i>Vessel Type</i>                                                                  | <b>V4</b> | <b>V3</b> | <b>V2</b> | <b>V1</b> | <b>A4</b> | <b>A3</b> | <b>A2</b> | <b>A1</b> |
| <i>Layer I</i>                                                                      | <b>69</b> | <b>53</b> | <b>32</b> | <b>20</b> | <b>43</b> | <b>33</b> | <b>20</b> | <b>13</b> |
| <i>Layer II/III</i>                                                                 | <b>67</b> | <b>51</b> | <b>26</b> |           | <b>43</b> | <b>32</b> | <b>16</b> |           |
| <i>Layer IV</i>                                                                     | <b>62</b> | <b>41</b> |           |           | <b>39</b> | <b>26</b> |           |           |
| <i>Layer V</i>                                                                      | <b>56</b> |           |           |           | <b>35</b> |           |           |           |
| <i>Layer VI</i>                                                                     | <b>44</b> |           |           |           | <b>28</b> |           |           |           |

193

## 194 **2.2 BOLD and VASO MR signal models**

195 The MR signal model employed here is a steady state model contrasting signal  
 196 levels at baseline and during activity (Markuerkiaga et al., 2016; Uludağ et al., 2009).  
 197 At baseline, the total MR signal  $S_{tot}^{base}$  is the sum of the volume-weighted intra-(IV) and  
 198 extra-vascular (EV) signal components (Buxton, 2009; Obata et al., 2004; Uludağ et  
 199 al., 2009):

$$S_{base}^{tot} = (1 - CBV_{base}) \cdot S_{base}^{EV} + \sum_i S_{base,i}^{IV} \cdot CBV_{base,i}, \quad \text{Equation 6}$$

200 where CBV is the baseline blood volume, and  $i$  denotes different vascular  
 201 compartments, i.e., arterioles, capillaries, venules, ICVs, and ICAs. In the following,  
 202 we describe the intra- and extra-vascular BOLD and VASO signals when using a GRE  
 203 readout at 7T.

204 The BOLD signal is approximated as a mono-exponential decay (Yablonskiy  
 205 and Haacke, 1994), where  $T_E$  is the echo time,  $S_0$  the effective spin density at  $T_E = 0$ ,  
 206 and  $R_2^*$  the transverse relaxation rate:

$$S^{BOLD} = S_0 \cdot e^{-T_E \cdot R_2^*}. \quad \text{Equation 7}$$

207

208

209 The transverse relaxation rate is the sum of the intrinsic ( $R_{2,0}^*$ ) and hemoglobin  
 210 (Hb)-induced transverse relaxation rates ( $R_{2,Hb}^*$ ):

$$R_2^* = R_{2,0}^* + R_{2,Hb}^* \quad \text{Equation 8}$$

211 All intrinsic and Hb-induced  $R_2^*$  values used in this model (Blockley et al., 2008;  
 212 Uludağ et al., 2009) are summarized in Table 2. Extra- and intra-vascular BOLD  
 213 signals are estimated using their corresponding relaxation rates. In short, the Hb-  
 214 induced extra-vascular relaxation rate is calculated according to the susceptibility-  
 215 induced shift at the surface of the vessel depending on the oxygenation level ( $Y$ )  
 216 (Uludağ et al., 2009). The intra-vascular  $T_2^*$  of the ICVs (intrinsic and Hb-induced) are  
 217 very short at high field (7T and above). Therefore, the intra-vascular signal in veins  
 218 approaches zero (Uludağ et al., 2009), and the main intra-vascular contribution comes  
 219 from the arterial and capillary side of the vasculature.

220 Table 2: The intrinsic and Hb-induced intra- and extra-vascular transverse relaxation rates used in the  
 221 BOLD signal model (Uludağ et al., 2009).

| Compartment             | Intrinsic Relaxation Time                      | Hb-induced Relaxation Time                                                                                                                                                                       |
|-------------------------|------------------------------------------------|--------------------------------------------------------------------------------------------------------------------------------------------------------------------------------------------------|
| Intra-vascular (blood)  | $R_{2,IV,0}^*$ (s <sup>-1</sup> )<br>67        | $R_{2,IV,Hb}^*$ (s <sup>-1</sup> )<br>$C \cdot (1 - Y)^2$                                                                                                                                        |
| Extra-vascular (tissue) | $R_{2,EV,0}^*$ (s <sup>-1</sup> )<br><b>34</b> | $R_{2,EV,Hb}^*$ (s <sup>-1</sup> )<br>$R_{2,EV,Hb}^* = (e \cdot \Delta v_s + f) \cdot CBV_i$<br>$\Delta v_s = \frac{\Delta \chi_0}{4\pi} \cdot Hct \cdot ( Y_{off} - Y ) \cdot \gamma \cdot B_0$ |

$C$ : constant that depends on the magnetic field strength (= 536.48).

$\Delta v_s$ : the susceptibility-induced shift at the surface of the vessel corresponds to Larmor frequency shift (depends on  $Y$ ).

$\Delta \chi_0$ : the susceptibility of blood with fully deoxygenated blood (=  $4\pi \cdot 0.264$  ppm).

$Y_{off}$ : the oxygenation level that produces no magnetic susceptibility difference between intra-vascular and extra-vascular fluids (= 95 %).

$Hct = 40$  %

$e = 0.0453$  and  $f = -0.19$ : fitting coefficients.

222

223

224 Following neural activity and changes in blood volume and oxygenation, the  
225 total MRI signal is:

$$S_{\text{act}}^{\text{tot}} = (1 - CBV_{\text{act}}) \cdot S_{\text{act}}^{\text{EV}} + \sum_i S_{\text{act}}^{\text{IV}} \cdot CBV_{\text{act},i} \quad \text{Equation 9}$$

226 where  $CBV_{\text{act}} = CBV_{\text{base}} + \Delta CBV_{\text{abs}}$  and  $\Delta CBV_{\text{abs}} = \Delta CBV_{\text{rel}} \cdot CBV_{\text{base}}$ . Note that  
227  $\Delta CBV_{\text{abs}}$  denotes the blood volume change upon activation in ml/100ml tissue  
228 commonly used (Huber et al., 2015; Lu et al., 2013) and  $\Delta CBV_{\text{rel}}$  in % baseline blood  
229 volume, which is the definition implemented in the cortical vascular model. The  
230 increase in oxygenation is reflected in the shortening of the relaxation rates, which  
231 leads to increased extra- and intra-vascular signal levels. The BOLD signal change in  
232 percent (%) following neural activity can be described as the signal difference between  
233 baseline and activation, normalized to the baseline signal level:

$$\frac{\Delta S}{S_{\text{base}}} = \frac{S_{\text{act}}^{\text{tot}} - S_{\text{base}}^{\text{tot}}}{S_{\text{base}}^{\text{tot}}} \cdot 100 [\%]. \quad \text{Equation 10}$$

234 For VASO, assuming a perfect inversion pulse, signal change arises only from  
235 the extravascular component, as the intra-vascular signal is nulled with an inversion  
236 pulse. The steady state nulled tissue signal is (Huber et al., 2014b; Lu et al., 2003; Lu  
237 et al., 2013):

$$S^{\text{EV,nulled}} = S_0 \left( 1 - (1 + \varepsilon) e^{\frac{-T_1}{T_1}} + \varepsilon e^{\frac{-T_R}{T_1}} \right) \cdot e^{-T_E \cdot R_{2,EV}^*}, \quad \text{Equation 11}$$

238 in which  $\varepsilon$  is the inversion efficiency (here assumed to be equal to 1),  $T_1/T_1/T_R$  are the  
239 blood nulling time, longitudinal relaxation time, and repetition time, respectively. At the  
240 time of the blood nulling, a BOLD signal contamination — the  $T_2^*$ -dependency — is still  
241 present and needs to be corrected. The dynamic division approach proposed by Huber  
242 et al. (2014b) removes the  $T_2^*$ -contribution from the VASO signal by dividing the  
243 “nulled” by the “non-nulled” signal, assuming equal extravascular BOLD contributions  
244 in both images and negligible intravascular BOLD signal:

$$S^{EV,VASO} = \frac{S^{EV,nulled}}{S^{EV,non-nulled}} = \left( 1 - (1 + \varepsilon) \cdot e^{\frac{T_I}{T_1}} + \varepsilon \cdot e^{\frac{-T_R}{T_1}} \right) \quad \text{Equation 12}^1$$

245 Then, the VASO signal during baseline, activity, and total VASO signal change can be  
246 derived from Equation 6, 9, and 10 by considering only the extra-vascular components:

$$\begin{aligned} S_{\text{base}}^{\text{tot},VASO} &= (1 - CBV_{\text{base}}) \cdot S^{EV,VASO} \\ S_{\text{act}}^{\text{tot},VASO} &= (1 - CBV_{\text{act}}) \cdot S^{EV,VASO} \\ \frac{\Delta S^{\text{VASO}}}{S_{\text{base}}^{\text{VASO}}} &= \frac{-\Delta CBV_{\text{abs}}}{1 - CBV_{\text{base}}}. \end{aligned} \quad \text{Equation 13}$$

247 Thus, VASO signal changes are only a function of CBV change and baseline CBV,  
248 and independent of oxygenation changes.

## 249 **2.3 Model Assumptions and Simulations**

250 To simulate depth-dependent BOLD and VASO signal changes, the cortical  
251 vascular model outlined in section 2.1 requires  $\Delta CBV$  and oxygenation values at  
252 baseline and activity for each depth and vascular compartment. Note that  $\Delta CBV$  here  
253 denotes  $\Delta CBV_{\text{rel}}$ , which is given in percent of the baseline CBV, i.e., an increase of  
254 100 % means that CBV during activation is twice as large as during baseline. Further,  
255 oxygenation is given in percent oxygen saturation, with 100 % oxygenation  
256 corresponding to fully oxygenated blood. The resulting BOLD and VASO profiles are  
257 presented in percent signal change following Equation 10 and 13.

258 To find the input values that best fit the empirical data (see Section 3.2) we  
259 simulated numerous profiles for a wide range of input parameters (Table 3), and then  
260 calculated the root-mean-squared-error (RMSE) for each simulated profile with the  
261 experimental result. The minimum RMSE value indicates the highest similarity  
262 between simulated and measured depth-dependent responses. To investigate the  
263 effect of input parameters on the resulting depth-dependent profiles, we also plotted  
264 the range of profiles obtained with RMSEs that are 20 % higher than the minimum  
265 RMSE and extracted the corresponding input values for  $\Delta CBV$  and oxygenation. For

---

<sup>1</sup> Note that  $S_{EV}^{\text{non-nulled}}$  corresponds to the extravascular BOLD signal. During the BOLD correction of the experimental data, we assume the intravascular BOLD signal to be negligible following Huber et al. (2014), and Genois et al. (2021).

266 reference, we have included the original values used in Markuerkiaga et al. (2016) in  
267 square brackets in Table 3.

268 To account for partial volume effects across layers and provide a better  
269 comparison between simulated and measured depth-dependent responses  
270 (Markuerkiaga et al., 2016), we applied a smoothing kernel (Koopmans et al., 2011)  
271 to the simulated profiles. The resulting zero-padded edges of the laminar profiles were  
272 thus excluded from the RMSE estimation and all simulated profiles, and only the  
273 central eight data points contributed.

274 In the original version of the cortical vascular model, Markuerkiaga et al. (2016)  
275 assumed the same increase in CBV of 16.6 % (Griffeth et al., 2015) in each  
276 compartment of the laminar network across all depths. Using these input values, the  
277 resulting depth-dependent VASO signal change (see Figure 8) did not exhibit the  
278 characteristic peak in the middle layers observed in our and other VASO experiments  
279 (Huber et al., 2014a). We therefore assumed a non-uniform activation strength across  
280 the layers (Equation 14). For the VASO simulations, we assumed in the laminar  
281 network a 1.5 times higher CBV increase in middle cortical layers (*IV*) compared with  
282 deep (*V* and *VI*) and superficial (*I* and *II/III*) layers (Zhao et al., 2006). In ICAs and  
283 ICVs, we assumed higher CBV change in middle and upper cortical layers compared  
284 with deep layers (see Figure 2):

$$CBV_{act}^{[l]} = CBV_{base}^{[l]} \cdot (1 + \beta^{[l]} \cdot \Delta CBV_{rel}),$$

Equation 14

285 in which  $\beta$  refers to the activation strength and  $\beta = 1.5$  for middle depths,  $\beta =$   
286 1 for superficial and deep cortical depths (Figure 2), and  $l$  denotes the cortical layers.  
287 We then simulated VASO profiles using this ratio for a range of  $\Delta CBV$  values of  
288 0 - 90 % for ICAs, arterioles, capillaries, venules, and ICVs (Table 3). In the original  
289 version of the cortical vascular model (Markuerkiaga et al., 2016), ICVs were  
290 considered not to dilate as shown by Hillman et al. (2007). However, other studies in  
291 cats (Kim and Kim, 2011b), mice (Takano et al., 2006), and humans (Chen and Pike,  
292 2009; Stefanovic and Pike, 2005) observed dilation in ICVs, in particular for long  
293 stimulus duration. Therefore, we allowed this parameter to vary as well.  
294

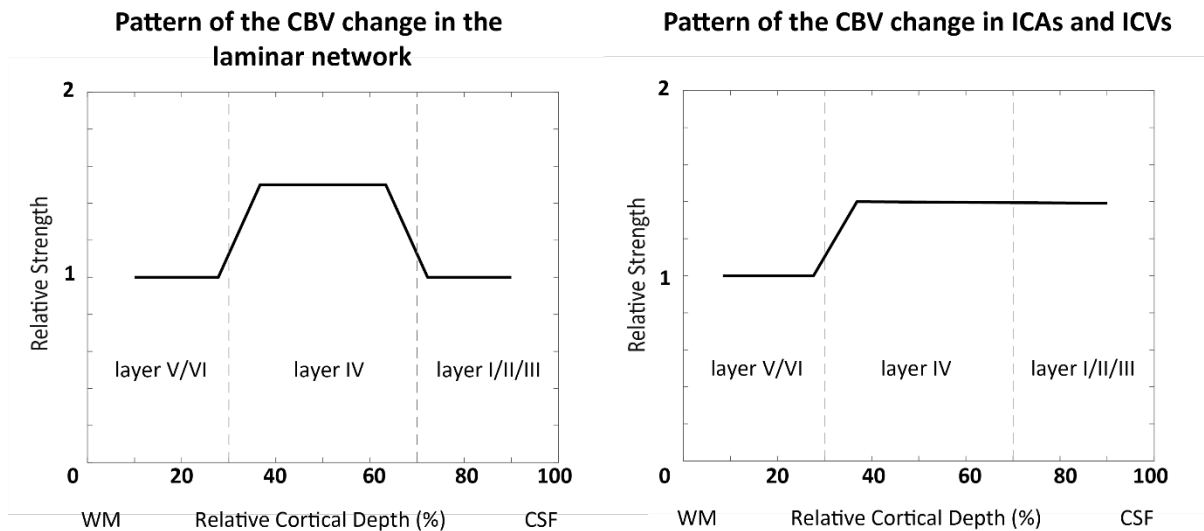

296 Figure 2: The pattern of the CBV change in the laminar network (left), and ICAs and ICVs (right) across  
297 the layers used in our simulations. According to the result shown in Figure 3 of Zhao et al. (2006), we  
298 assumed a higher CBV change in middle cortical layers by a factor of 1.5 in the laminar network. In  
299 ICAs and ICVs, the assumption is that the CBV change in deep layers is 2/3 of the change in middle  
300 and superficial layers.

301 For the BOLD simulations, we used the  $\Delta$ CBV values of the best fit from the  
302 VASO experiment, and instead varied oxygenation values between 60-75 % at  
303 baseline and 75-90 % at activation in the venules and ICVs (see Table 3). Following  
304 Markuerkiaga et al. (2016) and Uludağ et al. (2009), we assumed fixed oxygen  
305 saturation in ICAs, arterioles and capillaries at baseline and activation as outlined in  
306 Table 3, but varied the oxygen saturation of the venules and ICVs at baseline and  
307 activation to find the best fit.  
308

309 Table 3: Range of the model parameters for simulating VASO and BOLD depth-dependent responses.  
 310 The values in brackets refer to the values used in the original vascular model (Markuerkiaga et al.,  
 311 2016).  $Y_{base}$  and  $Y_{act}$  are the blood oxygenation at baseline and activation, and  $\Delta CBV_{mid}$  refers to the  
 312 CBV change in middle layer. In the laminar network, the CBV change in middle layers is 1.5 times  
 313 higher than in deep and superficial layers. In ICAs and ICVs,  $\Delta CBV$  in middle and upper layers is 1.5  
 314 times higher than the change in deep layers.

| <b>Vascular Compartments CBV and Oxygenation</b> |                    |                    |                     |                      |              |
|--------------------------------------------------|--------------------|--------------------|---------------------|----------------------|--------------|
|                                                  | <b>arterioles</b>  | <b>capillaries</b> | <b>venules</b>      | <b>ICVs</b>          | <b>ICAs</b>  |
| $Y_{base}$                                       | 95 %<br>[95 %]     | 85 %<br>[85 %]     | 60- 75* %<br>[60 %] | 60-75* %<br>[60 %]   | 95 %<br>--   |
| $Y_{act}$                                        | 100 %<br>[100 %]   | 95 %<br>[95 %]     | 75-90† %<br>[70 %]  | 75-90† %<br>[70 %]   | 100 %<br>--  |
| $\Delta CBV_{mid}$                               | 0–90 %<br>[16.6 %] | 0-90 %<br>[16.6 %] | 0-90 %<br>[16.6 %]  | <b>0-90 %</b><br>0 % | 0-90 %<br>-- |

\*Corresponds to  $R_{2,IV}^* = 100 - 153 \text{ sec}^{-1}$

†Corresponds to  $R_{2,IV}^* = 72 - 100 \text{ sec}^{-1}$

## 315 **2.4 The effect of depth-dependent vs constant baseline** 316 **CBV on the simulated profiles**

317 To investigate the effect of variation in baseline CBV across depths, we  
 318 performed the same simulation and fitting procedures, but assumed a constant  
 319 baseline CBV across depths in the laminar network. We used a baseline CBV value  
 320 of 2.3 % across layers, which is the average of the depth-dependent baseline CBV  
 321 (Weber et al., 2008, Figure 1B). Figure 3 shows the baseline CBV of the laminar  
 322 network, the baseline CBV in ICVs and ICAs (model output), and the total CBV of the  
 323 vasculature (average ~3.7 %) for this scenario. The aim of these simulations was to  
 324 investigate which impact the pattern of the baseline CBV (constant vs depth-  
 325 dependent) has on the simulated BOLD and VASO responses.

326

### Baseline Blood Volume assuming constant baseline CBV in the laminar network

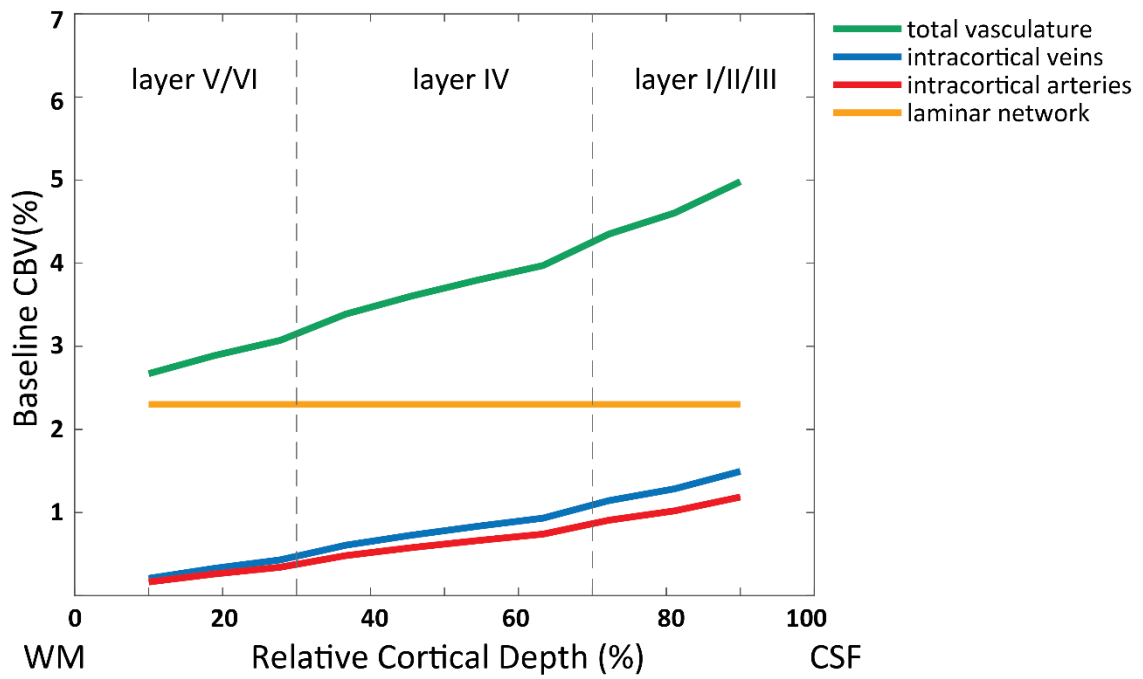

328 Figure 3: Baseline blood volume of the laminar network (i.e., arterioles, capillaries, venules), intra-  
329 cortical arteries, veins, and total vasculature in the “constant” baseline CBV scenario. We used the  
330 average of the baseline CBV in laminar network (2.3 %) reported in Weber et al. (2008).  
331



## 332 **3 Experimental Methods**

### 333 **3.1 Model Implementation**

334 The cortical vascular model was implemented in MATLAB (2018b, The  
335 MathWorks, Inc.). The code is available on gitlab  
336 (<https://gitlab.com/AtenaAkbari/cortical-vascular-model>) including the original version  
337 used in Markuerkiaga et al. (2016) (branch: originalCode), the implementation used  
338 for an earlier version of this work presented at the ISMRM 2020 in which intra-cortical  
339 arteries were not yet added (Akbari et al., 2020) (branch: vasoSignal), and the  
340 implementation used in this manuscript (branch: master).

### 341 **3.2 Image Acquisition**

342 Imaging was performed on a 7T whole-body MR scanner (Siemens Healthcare,  
343 Erlangen, Germany), with a maximum gradient strength of 70 mT/m and a slew rate  
344 of 200 mT/m/s. A single-channel Tx and 32-channel Rx head coil array (Nova Medical,  
345 Wilmington, MA, USA) was used for radiofrequency transmission and signal reception.  
346 The slice-selective slab-inversion (SS-SI) VASO sequence (Huber et al., 2014b) was  
347 employed to scan ten healthy participants (2 females and 8 males; age range 19-32  
348 years) after giving written informed consent according to the approval of the  
349 institutional ethics committee. For each subject, BOLD and VASO images were  
350 acquired in an interleaved fashion in three runs with 400 volumes in each run (15  
351 minutes total acquisition time per run). The sequence parameters were:  $T_R = 4.5s$ ,  
352  $T_E = 25 ms$ ,  $T_I = 1100 ms$ , GRAPPA (Griswold et al., 2002) acceleration factor = 3,  
353 isotropic voxel size =  $0.8 mm^3$ , number of slices = 26, partial Fourier in the phase  
354 encoding direction =  $6/8$ , in combination with a 3D EPI readout (Poser et al., 2010).  
355 The blood-nulling time was chosen based on the assumed value of blood  $T_1 = 2100 ms$   
356 following earlier VASO studies at 7T (Huber et al., 2015; Huber et al., 2016; Zhang et  
357 al., 2013). The visual stimulus consisted of 15 ON- and OFF-blocks with 30 s duration  
358 each. During the ON condition, a flashing black and white noise pattern was  
359 presented, and a fixation cross was the OFF condition of the stimulus (Polimeni et al.,  
360 2005). The imaging slices were positioned and oriented such that the center of the  
361 imaging slab was aligned with the center of the calcarine sulcus, the part of the striate

362 cortex with the highest vascular density in layer *IV* of V1 (Duvernoy et al., 1981).  
363 Whole-brain MP2RAGE images (Marques et al., 2010; O'Brien et al., 2014) were  
364 acquired with an isotropic resolution of 0.75 mm for each participant in the same  
365 session as the functional imaging.

### 366 **3.3 Image Analysis**

367 The first volume of each contrast was discarded to ensure  $T_1$  effects were at  
368 equilibrium. Dynamic division was then performed to account for the BOLD-  
369 contamination (Huber et al., 2014b). The BOLD and BOLD-corrected VASO images  
370 were motion corrected using SPM12 (Wellcome Department, UK). Activation maps  
371 were estimated with the GLM analysis in SPM with no spatial smoothing. Data from  
372 three participants were discarded due to excessive motion, i.e., volume-to-volume  
373 displacement of more than one voxel size. Voxels with t-values above 2.3  
374 corresponding to an uncorrected significance level of  $p < 0.01$  were identified as the  
375 activated regions for both BOLD and BOLD-corrected VASO images.

376 For the layer analysis, we followed the steps outlined in Huber et al. (2014b):  
377 The  $T_1 - EPI$  images of each subject were used for WM/GM and GM/CSF boundary  
378 delineation, and a region of interest (ROI) was manually defined such that the  
379 activated regions in the calcarine sulcus from both contrasts were included (see Figure  
380 4). Then, this ROI was used to create ten equi-volume layers (Waehnert et al., 2014)  
381 using the open-source LAYNII package (Huber et al., 2021) and extract depth-  
382 dependent BOLD and VASO responses. The average of the percentage signal change  
383 extracted from each layer forms the layer profile in both VASO and BOLD contrast.  
384 The mean and standard error of the mean were calculated across participants, and  
385 average BOLD and VASO responses across the seven participants were used as a  
386 reference when evaluating the model predictions. Note that cortical layers in these  
387 analyses refer to a group of voxels obtained by dividing the ROI into 10 equi-volume  
388 layers and do not refer to the histological cortical layers. In the next section, we will  
389 first present the imaging results, and then introduce the simulations that fit these best.  
390 Further, we will present the simulated profiles with an RMSE 20 % higher than the  
391 minimum RMSE, and the  $\Delta CBV$  and oxygenation values corresponding to these  
392 profiles.

393

## 394 **4 Results**

### 395 **4.1 Imaging**

396           The BOLD and VASO activation maps of all seven participants included in this  
397 study are shown in Figure 4. We observed overall higher t-values for the BOLD  
398 contrast compared to the VASO contrast. Further, highest t-values for BOLD are  
399 located at the cortical surface and within various sulci. In contrast, most of the VASO  
400 response is confined to the grey matter. An example of the ROI placed on V1 to extract  
401 the 10 equi-volume layers and estimate the depth-dependent profiles is shown for one  
402 subject in Figure 4.

403           The depth-dependent BOLD and VASO signal changes for each participant as  
404 well as the mean and standard error of the mean of these profiles are shown in Figure  
405 5. On average, we observed a mean signal change of 6 % for BOLD and 1 % for  
406 VASO, evidence for the larger effect size of the BOLD contrast. In agreement with  
407 previous studies, BOLD signal change peaks at the cortical surface (Fracasso et al.,  
408 2018; Koopmans et al., 2010; Olman et al., 2012; Polimeni et al., 2010) while the  
409 VASO signal change has its maximum in the middle cortical layers (Huber et al.,  
410 2014a).

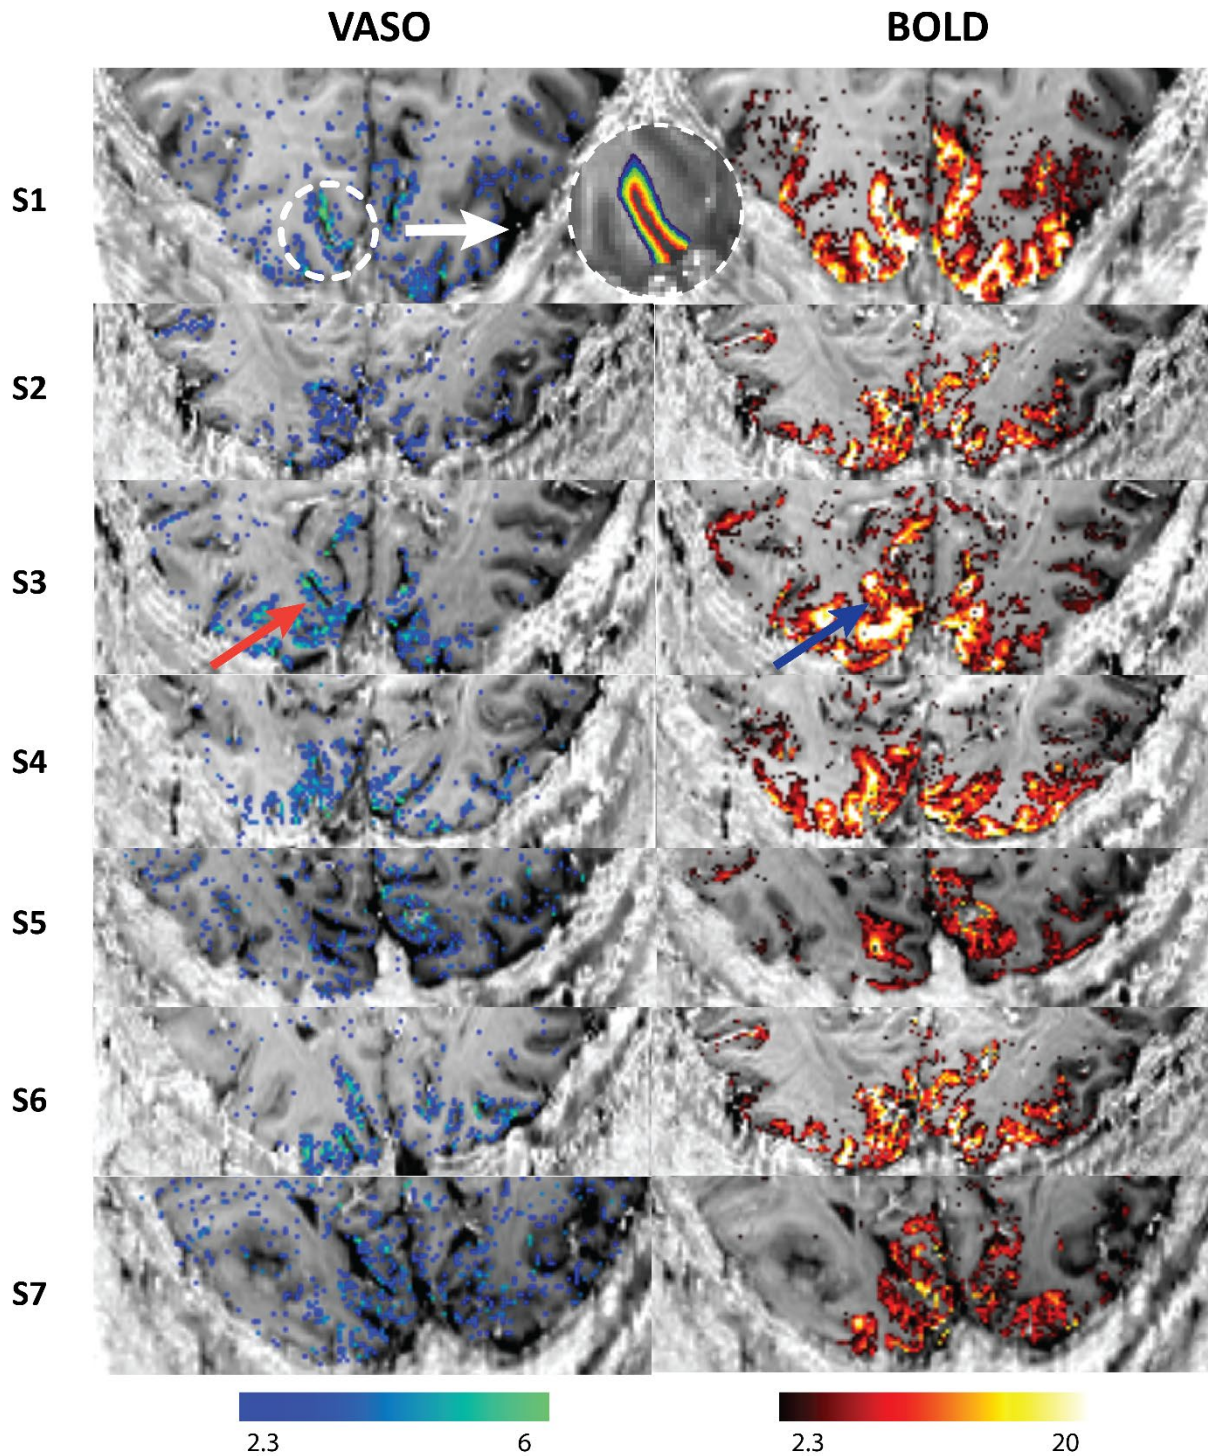

412 Figure 4: VASO and BOLD statistical activation maps of all participants in our study using the SS-SI  
413 VASO sequence (Huber et al., 2014b) with an isotropic resolution of  $0.8 \text{ mm}^3$ . The activation maps are  
414 overlaid on  $T_1 - EPI$  images of each subject. The VASO contrast is more confined to GM while BOLD  
415 shows higher activity near surface (indicated with the red and blue arrows). An example of the region-  
416 of-interest (ROI) in V1 for the layer analysis is shown above. Ten equi-volume layers were extracted  
417 from GM in the  $T_1 - EPI$  images to calculate the mean signal change in each layer.  
418

419

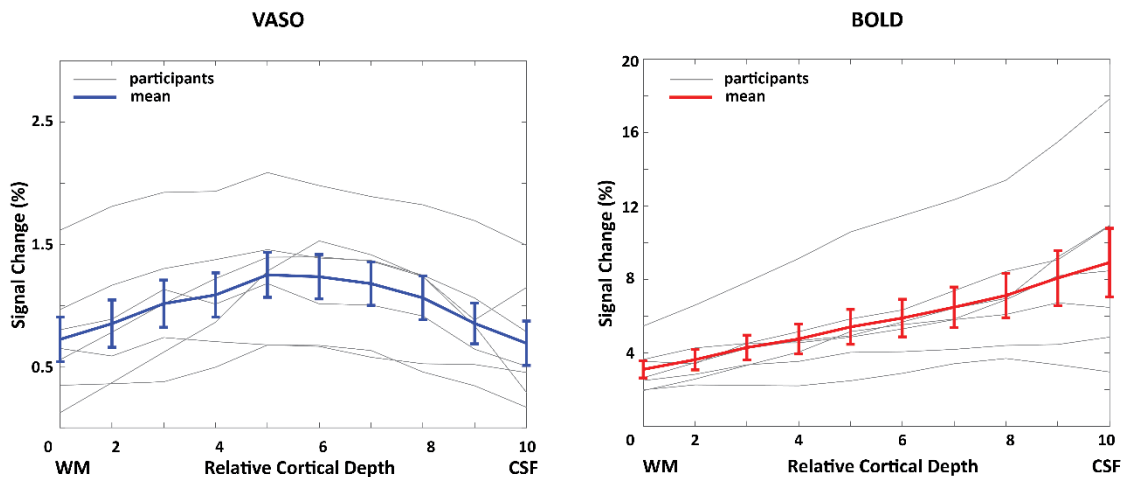

421 Figure 5: Depth-dependent VASO and BOLD signal changes (%) in human V1 for each individual  
422 participant (gray) and averaged across all participants (blue and red). Note that the profiles plotted here  
423 are the average of the percentage signal change extracted from each layer. The error bars in this and  
424 all following graphs refer to the standard error of the mean across all participants.

## 425 4.2 Simulations

### 426 4.2.1 Depth-dependent BOLD and VASO profiles

427 The simulated VASO profile with the best fit using a depth-dependent baseline  
428 CBV in the laminar network (Figure 1) is shown in Figure 6, and corresponding CBV  
429 changes are shown in Table 4. We estimated highest CBV changes in arterioles and  
430 capillaries (56 %) and in ICAs (21 %), and small CBV changes in venules (2 %) and  
431 ICVs (5 %). Using a Grubb value (Grubb et al., 1974) of 0.35, the corresponding CBF  
432 change upon activation in middle layers would be 58 % in ICAs, 82 % in arterioles and  
433 capillaries, 25 % in venules, and 35 % in ICVs. For BOLD, the simulation with the best-  
434 fit yields  $Y_{base} = 70\%$  and  $Y_{act} = 90\%$  in venules and ICVs. To investigate the  
435 sensitivity of the model to the choice of input parameters, the shaded area in Figure 6  
436 illustrates the range of profiles with an RMSE up to 20 % higher than the minimum  
437 RMSE. The resulting profiles remain predominantly within the standard error of the  
438 measured profiles.

439

440 Table 4: CBV changes in vascular compartments corresponding to the best-fit shown in Figure 6, i.e.  
 441 assuming a depth-dependent baseline CBV. The minimum and maximum of the estimated CBV change  
 442 in the 20 % RMSE regime (i.e., the minimum RMSE + 20 % of the minimum RMSE shown as the shaded  
 443 area in Figure 6) are shown in brackets.

| <b>CBV Change in Vascular Compartments</b> |                                     |                          |                           |                          |
|--------------------------------------------|-------------------------------------|--------------------------|---------------------------|--------------------------|
| <b>Cortical depth</b>                      | <b>Arterioles &amp; capillaries</b> | <b>venules</b>           | <b>ICAs</b>               | <b>ICVs</b>              |
| <b>Deep (V, VI)</b>                        | <b>37 %</b><br>[21 % 41 %]          | <b>1 %</b><br>[0 % 49 %] | <b>14 %</b><br>[0 % 42 %] | <b>3 %</b><br>[0 % 42 %] |
| <b>Middle (IV)</b>                         | <b>56 %</b><br>[32 % 62 %]          | <b>2 %</b><br>[0 % 73 %] | <b>21 %</b><br>[0 % 63 %] | <b>5 %</b><br>[0 % 63 %] |
| <b>Superficial (I, II/III)</b>             | <b>37 %</b><br>[32 % 62 %]          | <b>1 %</b><br>[0 % 49 %] | <b>21 %</b><br>[0 % 63 %] | <b>5 %</b><br>[0 % 63 %] |

444

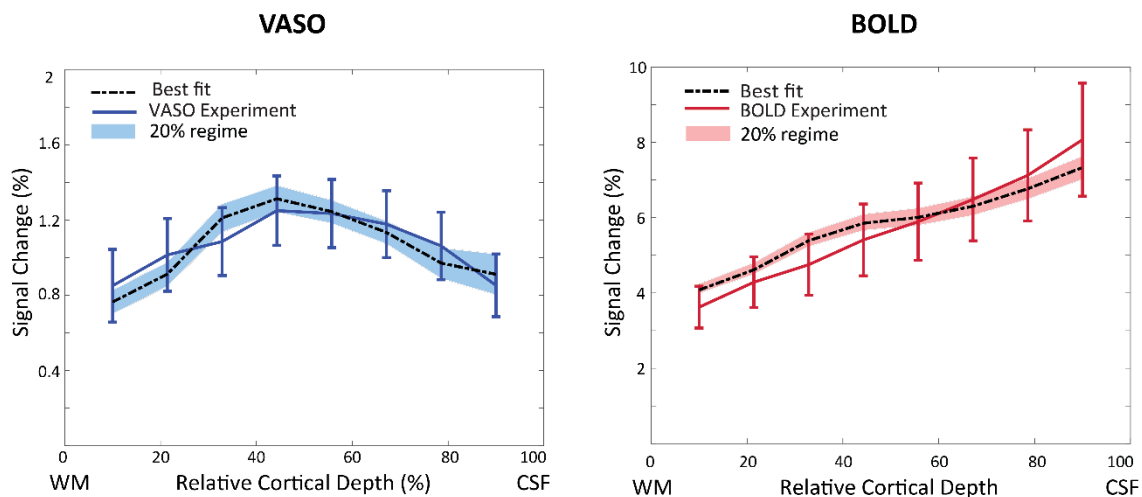

446 Figure 6: The measured VASO (left) and BOLD (right) profiles and the simulated profiles with the lowest  
 447 RMSE (black line) assuming a depth-dependent baseline CBV (Figure 1). Shaded area shows the  
 448 VASO and BOLD simulated profiles with RMSE 20 % higher than the minimum RMSE.

#### 449 **4.2.2 The effect of constant baseline CBV on the simulated profiles**

450 Figure 7 illustrates the simulation results assuming a constant baseline CBV  
 451 across depths (Figure 3). This assumption produces a better fit for both VASO and  
 452 BOLD profiles and a smaller 20 %-RMSE regime (shaded area). Note, however, that  
 453 in the laminar network we are still assuming a 1.5 times higher CBV change in middle  
 454 layers than in superficial and deep layers (Figure 2, Equation 14). Again, highest CBV

455 change was estimated in arterioles and capillaries (65 % in middle layers), and small  
 456 CBV changes in all other compartments (Table 5). For BOLD, the best fit estimates 71  
 457 % and 90 % oxygen saturation at baseline and activation, respectively.

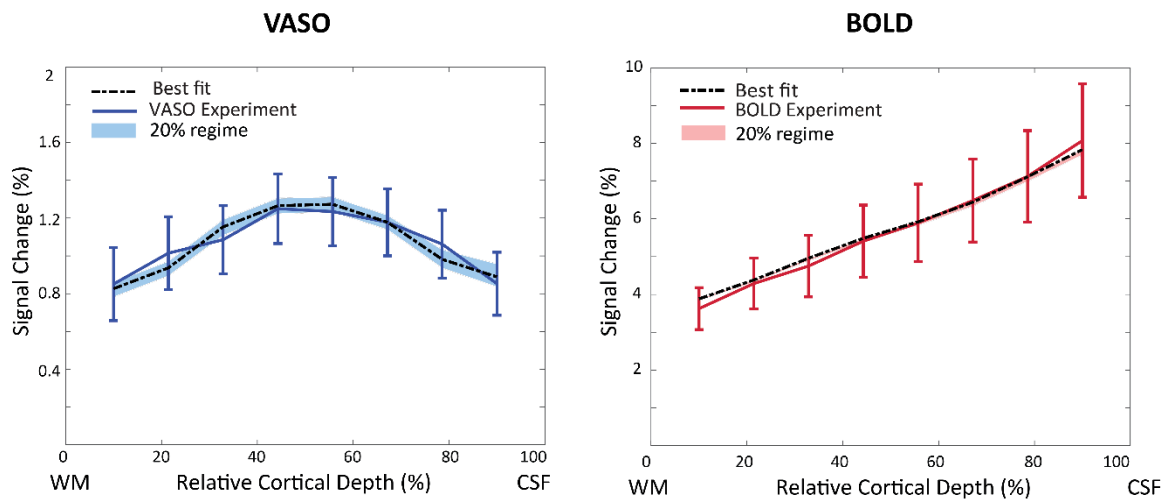

459 Figure 7: The measured and simulated VASO and BOLD profiles assuming a constant baseline CBV  
 460 of 2.3 % in the laminar network. The shaded areas show the RMSEs that are 20 % higher than the  
 461 minimum RMSE. The high agreement between BOLD simulation and measurement resulted in a low  
 462 minimum RMSE, and a correspondingly very narrow 20 % RMSE regime.

463 Table 5: CBV changes in vascular compartments corresponding to the best fit shown in Figure 7, i.e.,  
 464 assuming a constant baseline CBV of 2.3 % in the laminar network. The minimum and maximum of the  
 465 estimated CBV change in the 20 % RMSE regime (i.e., the minimum RMSE+20 % of the minimum  
 466 RMSE shown as the shaded area in Figure 7) are shown in brackets.

| <b>CBV Change in Vascular Compartments</b> |                                     |                          |                          |                          |
|--------------------------------------------|-------------------------------------|--------------------------|--------------------------|--------------------------|
| <b>Cortical depth</b>                      | <b>Arterioles &amp; capillaries</b> | <b>venules</b>           | <b>ICAs</b>              | <b>ICVs</b>              |
| <b>Deep (V, VI)</b>                        | <b>43 %</b><br>[28 % 45 %]          | <b>0 %</b><br>[0 % 49 %] | <b>2 %</b><br>[0 % 10 %] | <b>1 %</b><br>[0 % 10 %] |
| <b>Middle (IV)</b>                         | <b>65 %</b><br>[42 % 68 %]          | <b>0 %</b><br>[0 % 73 %] | <b>3 %</b><br>[0 % 15 %] | <b>2 %</b><br>[0 % 15 %] |
| <b>Superficial (I, II/III)</b>             | <b>43 %</b><br>[28 % 45 %]          | <b>0 %</b><br>[0 % 49 %] | <b>3 %</b><br>[0 % 15 %] | <b>2 %</b><br>[0 % 15 %] |

467

### 468 4.2.3 The effect of constant relative CBV changes across depths

469 The simulation results of equal activation strength across layers (i.e.,  $\beta = 1$  for  
470 all layers in Equation 14 such that all layers are activated equally) are shown in  
471 Figure 8. Note that this equal activation strength across depths was the assumption in  
472 the original implementation (Markuerkiaga et al., 2016). However, under this  
473 assumption, the VASO profile is much flatter and does not show the expected higher  
474 CBV change in middle layers (Goense et al., 2012; Poplawsky and Kim, 2014; Zhao  
475 et al., 2006). In contrast, this scenario had little impact on the predicted BOLD profile  
476 that showed comparable characteristics and similar fitting performance, but the  
477 experimental VASO profile could not be reproduced. The best fit estimates 48 % CBV  
478 change in arterioles and capillaries, 3 % in venules, 12 % in ICAs, and 9 % in ICVs in  
479 middle layers. The corresponding oxygenation levels at baseline and activation are  
480 65 % and 86 %, respectively.

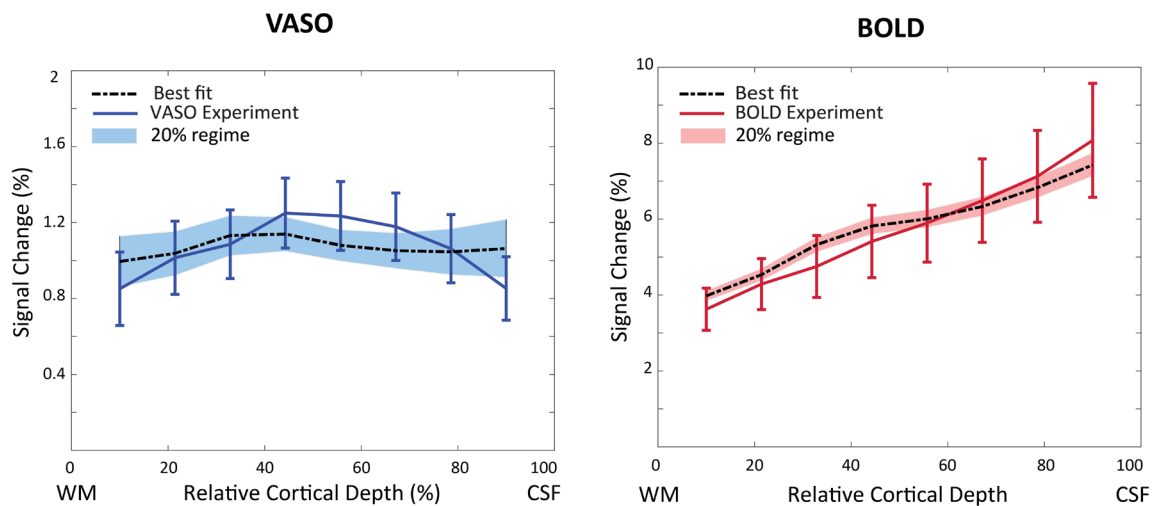

482 Figure 8: The measured and simulated VASO and BOLD profiles assuming a depth-dependent baseline  
483 CBV, but constant activation strength across depths. The simulated VASO profile deviates considerably  
484 from the measured response, whereas the fit to the BOLD data is comparable to the scenario with  
485 depth-dependent non-uniform activation strength.

486



## 487 **5 Discussion and Conclusion**

488 In this study, we extended and modified the cortical vascular model  
489 (Markuerkiaga et al., 2016) to simulate depth-dependent VASO signal changes in  
490 addition to BOLD signal changes and added intra-cortical arteries to the modelled area  
491 for a full description of CBV changes in the intra-cortical vasculature. With our  
492 simulations, we found that stimulus evoked CBV changes are dominant in small  
493 arterioles and capillaries at 56 % and in ICAs at 21 %, and that the contribution of  
494 venules and ICVs is small at 2 % and 5 %, respectively. These estimates of higher  
495 arterial CBV change are in line with previous studies, e.g. in mice with 60 s stimulus  
496 duration (Takano et al., 2006), cats with 40 s stimulus duration (Kim and Kim, 2010,  
497 2011b) and humans with 30 s or longer stimulus duration (Chen and Pike, 2009, 2010;  
498 Huber et al., 2014a). Chen and Pike (2009, 2010) also showed small CBV changes in  
499 veins with 180 s and 96 s stimuli, respectively. In a simulation study using the  
500 extended Windkessel model (Mandeville et al., 1999), Barrett et al. (2012) estimated  
501 dominant CBV change in arteries (64.8 %) and smaller CBV change in veins (21.5 %)  
502 with 30 s stimulus duration. In addition, it is also expected that the VASO contrast is  
503 overall less sensitive to CBV changes in venules and veins due to water exchange in  
504 the capillaries (Huber et al., 2014b; Jin and Kim, 2008b; Lu et al., 2003). In summary,  
505 the cortical vascular model allows to estimate and compare BOLD and VASO signal  
506 changes in various conditions and resolves the contributions of different vascular  
507 compartments to the fMRI signal.

508 The inclusion of ICAs allowed us to investigate the sensitivity of the VASO  
509 signal to upstream CBV changes. Although we found a relatively large CBV change of  
510 21 % in ICAs, the measured and simulated profiles did not show the pial bias that is  
511 commonly found in BOLD profiles (Barth and Norris, 2007; Kim et al., 1994; Turner,  
512 2002). This might be due to the different contrast mechanisms of VASO and BOLD,  
513 where the VASO signal is linearly proportional to CBV (Equation 13). Together with  
514 the low baseline blood volume in ICAs (Figure 1C), even a relatively large CBV change  
515 in ICAs might thus only have a limited impact on the resulting VASO profile. In contrast,  
516 the extravascular signal contributions around venules and ICVs presumably amplify  
517 the effect of oxygenation changes in these vessels on the BOLD signal (Equation 7  
518 and Table 2). Thus, the measured and simulated BOLD profiles are heavily skewed  
519 towards the signal stemming from ICVs. In conclusion, our results confirm that the

520 VASO contrast is less susceptible to large vessel effects compared to BOLD (Huber  
521 et al., 2014b; Huber et al., 2017b; Lu et al., 2003; Lu et al., 2013). As the model fits  
522 the measured BOLD response well, we didn't investigate the effect of the pial veins on  
523 the simulated laminar response. However, Markuerkiaga et al. (2021) added the pial  
524 vessels to the modelled area, and removed the contribution of downstream  
525 vasculature in laminar GRE-BOLD response using a deconvolution approach. This  
526 resulted in more spatially specific laminar BOLD responses that no longer show the  
527 bias towards the cortical surface.

528 In general, we found that a wide range of CBV changes in the different micro-  
529 and macro-vascular compartments can result in similar depth-dependent profiles  
530 (Table 4); indicating potential challenges when aiming to invert the measured profiles.  
531 These variations are illustrated in more detail using RMSE plots (see Figures S3 and  
532 S4 in the Supplementary Materials), where we observed high differentiability between  
533 macro- and micro-vascular compartments, but considerable interchangeability within  
534 each vascular class, such that for example a wide range of  $\Delta$ CBV combinations in  
535 ICVs and ICAs can result in comparable VASO profiles, and thus comparable RMSE  
536 values. Similarly, a change in oxygenation of 20 % provides the best fit for BOLD, but  
537 a wide range of oxygenation levels at baseline and a corresponding value during  
538 activity are possible.

539 To investigate the influence of the assumed baseline CBV on the simulated  
540 profiles, we compared the effect of assuming either a depth-dependent or a constant  
541 baseline CBV in the laminar network and found that a constant baseline CBV across  
542 depths provides a better fit to both BOLD and VASO profiles. However, this  
543 observation might be driven by uncertainties in defining an accurate depth-dependent  
544 baseline CBV, namely (i) the baseline CBV used here was derived from *ex vivo*  
545 macaque data (Weber et al., 2008), (ii) the WM/GM and GM/CSF boundary definition  
546 was manually performed in EPI image space introducing potential inaccuracies, and  
547 (iii) the depth-dependent profiles were averaged across participants. Consequently,  
548 an *average*, i.e. constant baseline might perform better in this case.

549 A slight divergence—but within the standard error of the mean—remains  
550 between simulated and measured data. Notably, the so-called “bump” (Chen et al.,  
551 2013; Havlicek and Uludağ, 2020; Huber et al., 2017a; Koopmans et al., 2010) is  
552 visible in the simulated BOLD profile but not the imaging data. Preliminary

553 investigations show that this feature seems to be mainly driven by the baseline CBV  
554 in this model (Figure 6 vs. Figure 7, see also Figure S1 in the Supplementary  
555 Materials), but in general is expected to have mixed neuronal and vascular origin  
556 (Havlicek and Uludağ, 2020). Note that this feature was also not evident in numerous  
557 studies using comparable acquisition and analysis techniques (de Hollander et al.,  
558 2021; De Martino et al., 2013; Fracasso et al., 2018; Klein et al., 2018; Marquardt et  
559 al., 2020; Polimeni et al., 2010).

560         The various parameters used to build the cortical vascular model such as blood  
561 velocity, vessel diameter, and baseline blood volume in capillaries were taken from  
562 previous research in rats, cats, rabbits, and macaques (Markuerkiaga et al., 2016;  
563 Weber et al., 2008; Zweifach and Lipowsky, 1977), which might impose uncertainties  
564 on the estimated CBV changes and simulated profiles. However, we took into account  
565 the inter-species differences in vascular structure and density by reversing the  
566 arterioles-to-venules ratio defined in the VAN model (Boas et al., 2008), as the arterial  
567 density in the human brain is higher than its venous density in contrast to the ratio in  
568 the rat brain (Cassot et al., 2009; Schmid et al., 2019). Here, we assumed an artery-  
569 to-vein ratio of 2-to-1 (Cassot et al., 2009; Schmid et al., 2019), but larger artery-to-  
570 vein ratios of 2.58 (Adams et al., 2015) and smaller artery-to-vein ratios of 1.6 (Weber  
571 et al., 2008) have also been reported in the literature for macaque brain. Further, we  
572 noticed that for certain parameter combinations the derived vessel diameters and  
573 blood velocities in the ICAs and ICVs can easily contradict previous reports that  
574 intracortical arteries have smaller diameter (Duvernoy et al., 1981) and faster blood  
575 velocities (Zweifach and Lipowsky, 1977). Thus, while the cortical vascular model aims  
576 for a detailed description of the underlying micro- and macro-vasculature and its  
577 influence on the MR signal, many uncertainties in the specific parameter choices  
578 remain. One example includes the dilation profile of the ICAs across cortical depths,  
579 where we assumed a higher CBV change in middle and superficial layers (Figure 2).  
580 However, another possible scenario could be an equal activation strength in ICAs  
581 across cortical depths (see Figure S5 and Figure S6 of the Supplementary Materials),  
582 which results in similar depth-dependent VASO and BOLD profiles, but different  
583 estimated CBV changes. Additionally, the inter-individual variability in these  
584 parameters remains unknown, but may potentially have a large effect on the individual  
585 profiles given the many studies showing significant differences in hemodynamic

586 responses between participants (Aguirre et al., 1998; Duann et al., 2002; Handwerker  
587 et al., 2004; Light et al., 1993). Consequently, a more detailed understanding of the  
588 relative impact of each of these parameters needs to be developed, in combination  
589 with auxiliary image acquisitions that measure relevant underlying parameters.

590 The experimental results show similar profiles as expected from previous  
591 research (Huber et al., 2013; Huber et al., 2016; Jin and Kim, 2006, 2008b; Koopmans  
592 et al., 2010). To ensure highest contrast-to-noise ratio when comparing with the  
593 simulations, we have averaged the responses across participants. We extracted  
594 percent signal change values using a GLM, assuming the same hemodynamic  
595 response for all cortical layers. Although each layer has a unique HRF (Petridou and  
596 Siero, 2017), we expect a negligible bias in the estimated signal change due to the  
597 very long stimulus time employed here. There is also evidence of the dependency of  
598 blood  $T_1$  on hematocrit levels (Dobre et al., 2007) affecting the blood nulling time,  
599 though the effect can be considered negligible.

600 The cortical vascular model used here presents a simplification of vascular  
601 anatomical networks (VAN) (Boas et al., 2008; Gagnon et al., 2015; Genois et al.,  
602 2020), but employs more details in the micro- and macro-vasculature than the fully  
603 invertible model developed by Havlicek and Uludağ (2020). Thus, it is uniquely suited  
604 to translate new insights from detailed VAN models developed in rat to the dynamic  
605 laminar models used to fit human data. As exemplified in this work using changes in  
606 CBV, the impact of each parameter on the resulting laminar profiles can be assessed  
607 individually, to then inform the choice of acquisition, potential vascular biases, and the  
608 need for auxiliary information. Next, the vascular anatomical model can be extended  
609 to other cortical areas characterized by different vascular properties such as primary  
610 motor cortex (Huber et al., 2017a; Oliveira et al., 2021a), primary somatosensory  
611 cortex (Shih et al., 2013; Silva and Koretsky, 2002), dorsolateral-prefrontal cortex  
612 (Finn et al., 2019), which are currently under active investigation using laminar fMRI  
613 to help to understand the vascular and neural signal contributions. In addition, the  
614 potential of higher spatial resolution can be explored with the model. For example,  
615 inspired by the study of Huber et al. (2015) who measured CBV responses in the  
616 macaque brain at 500  $\mu\text{m}$  resolution and observed a double-peak pattern, i.e., local  
617 maxima on both sides of the stria of Gennari, we simulated a depth-dependent VASO  
618 profile but without applying any smoothing kernel. Interestingly, the model prediction

619 indeed features a pattern that resembles a double peak corresponding to higher local  
620 CBV changes on both sides of stria of Gennari (Huber et al., 2015) (see Figure S7 in  
621 the Supplementary Materials).

622 In summary, we acquired BOLD and VASO laminar responses in human V1 at  
623 7T and simulated these responses using the cortical vascular model. To the best of  
624 our knowledge, this is the first study to acquire the laminar BOLD and VASO profiles  
625 in addition to simulating these responses in the human primary visual cortex. By fitting  
626 the model to our experimental results, we obtained an estimate of CBV change in all  
627 vascular compartments upon neural activity. Our simulation results show that stimulus  
628 evoked CBV change is dominant in small arterioles and capillaries followed by ICAs,  
629 and the contribution of venules and ICVs in total CBV change is small when the  
630 stimulus is relatively long (~30 sec). Our results also suggest that the large vessel bias  
631 is less prominent in VASO contrast compared with BOLD, as the BOLD signal  
632 relationship with the oxygenation change is exponential, but VASO depends on the  
633 CBV change linearly.

## 634 **6 Declaration of interests**

635 None.

## 636 **7 Acknowledgement**

637 We acknowledge the helpful discussions with and support from Laurentius  
638 (Renzo) Huber, Jonathan Polimeni, and Irati Markuerkiaga. We would also like to  
639 thank the anonymous reviewers for valuable feedback on the manuscript. We thank  
640 Aiman Al-Najjar and Nicole Atcheson for help with data collection. This work was  
641 supported by the NHMRC (grant APP1117020) and the NIH (grant R01-MH111419).  
642 MB acknowledges funding from ARC Future Fellowship grant FT140100865. AA  
643 acknowledges support through the University of Queensland Research Training  
644 Program Scholarship. We also acknowledge the facilities and scientific and technical  
645 assistance of the National Imaging Facility (NIF), a National Collaborative Research  
646 Infrastructure Strategy (NCRIS) at the Centre for Advanced Imaging, the University of  
647 Queensland.

648

## 649 **8 References**

- 650 Adams, D.L., Piserchia, V., Economides, J.R., Horton, J.C., 2015. Vascular supply of  
651 the cerebral cortex is specialized for cell layers but not columns. *Cerebral*  
652 *Cortex* 25, 3673-3681. <https://doi.org/10.1093/cercor/bhu221>.
- 653 Aguirre, G.K., Zarahn, E., D'Esposito, M., 1998. The variability of human, BOLD  
654 hemodynamic responses. *Neuroimage*. 8, 360-369.  
655 <https://doi.org/10.1006/nimg.1998.0369>.
- 656 Aitken, F., Menelaou, G., Warrington, O., Koolschijn, R.S., Corbin, N., Callaghan,  
657 M.F., Kok, P., 2020. Prior expectations evoke stimulus-specific activity in the  
658 deep layers of the primary visual cortex. *PLoS biology*. 18, e3001023.  
659 <https://doi.org/10.1371/journal.pbio.3001023>.
- 660 Akbari, A., Bollmann, S., Ali, T., Barth, M., 2020. Modelling the Laminar VASO Signal  
661 Change in Human V1 at 7T. 28th Annual Meeting of the International Society  
662 for Magnetic Resonance Imaging in Medicine.
- 663 An, H., Lin, W., 2002. Cerebral venous and arterial blood volumes can be estimated  
664 separately in humans using magnetic resonance imaging. *Magnetic*  
665 *Mesonance in Medicine*. 48, 583-588. <https://doi.org/10.1002/mrm.10257>.
- 666 Baez-Yanez, M.G., Siero, J.C., Petridou, N., 2020. A statistical 3D model of the  
667 human cortical vasculature to compute the hemodynamic fingerprint of the  
668 BOLD fMRI signal. *bioRxiv*. <https://doi.org/10.1101/2020.10.05.326512>.
- 669 Barrett, M.J., Tawhai, M.H., Suresh, V., 2012. Arteries dominate volume changes  
670 during brief functional hyperemia: evidence from mathematical modelling.  
671 *Neuroimage*. 62, 482-492. <https://doi.org/10.1016/j.neuroimage.2012.05.005>.
- 672 Barth, M., Norris, D., 2007. Very high-resolution three-dimensional functional MRI of  
673 the human visual cortex with elimination of large venous vessels. *NMR in*  
674 *Biomedicine*. 20, 477-484. <https://doi.org/10.1002/nbm.1158>.
- 675 Beckett, A.J., Dadakova, T., Townsend, J., Huber, L., Park, S., Feinberg, D.A., 2019.  
676 Comparison of BOLD and CBV using 3D EPI and 3D GRASE for cortical layer  
677 fMRI at 7T. *BioRxiv.*, 778142.
- 678 Blockley, N., Jiang, L., Gardener, A., Ludman, C., Francis, S., Gowland, P., 2008.  
679 Field strength dependence of R1 and R relaxivities of human whole blood to  
680 prohance, vasovist, and deoxyhemoglobin. *Magnetic Resonance in Medicine*.  
681 60, 1313-1320. <https://doi.org/10.1002/mrm.21792>.

- 682 Boas, D.A., Jones, S.R., Devor, A., Huppert, T.J., Dale, A.M., 2008. A vascular  
683 anatomical network model of the spatio-temporal response to brain activation.  
684 Neuroimage. 40, 1116-1129.  
685 <https://doi.org/10.1016/j.neuroimage.2007.12.061>.
- 686 Bollmann, S., Barth, M., 2020. New acquisition techniques and their prospects for  
687 the achievable resolution of fMRI. Progress in Neurobiology., 101936.  
688 <https://doi.org/10.1016/j.pneurobio.2020.101936>.
- 689 Buxton, R.B., 2009. Introduction to functional magnetic resonance imaging:  
690 principles and techniques. Cambridge university press.
- 691 Buxton, R.B., Uludağ, K., Dubowitz, D.J., Liu, T.T., 2004. Modeling the  
692 hemodynamic response to brain activation. Neuroimage. 23, S220-S233.  
693 <https://doi.org/10.1016/j.neuroimage.2004.07.013>.
- 694 Buxton, R.B., Wong, E.C., Frank, L.R., 1998. Dynamics of blood flow and  
695 oxygenation changes during brain activation: the balloon model. Magnetic  
696 Resonance in Medicine. 39, 855-864.  
697 <https://doi.org/10.1002/mrm.1910390602>.
- 698 Cassot, F., Lauwers, F., Lorthios, S., Puwanarajah, P., Duvernoy, H., 2009. Scaling  
699 laws for branching vessels of human cerebral cortex. Microcirculation. 16,  
700 331-344. <https://doi.org/10.1080/10739680802662607>.
- 701 Chai, Y., Li, L., Huber, L., Poser, B.A., Bandettini, P.A., 2019. Integrated VASO and  
702 perfusion contrast: A new tool for laminar functional MRI. Neuroimage.,  
703 116358. <https://doi.org/10.1016/j.neuroimage.2019.116358>.
- 704 Chen, G., Wang, F., Gore, J.C., Roe, A.W., 2013. Layer-specific BOLD activation in  
705 awake monkey V1 revealed by ultra-high spatial resolution functional  
706 magnetic resonance imaging. Neuroimage. 64, 147-155.  
707 <https://doi.org/10.1016/j.neuroimage.2012.08.060>.
- 708 Chen, J.J., Pike, G.B., 2009. BOLD-specific cerebral blood volume and blood flow  
709 changes during neuronal activation in humans. NMR in Biomedicine 22, 1054-  
710 1062. <https://doi.org/10.1002/nbm.1411>.
- 711 Chen, J.J., Pike, G.B., 2010. MRI measurement of the BOLD-specific flow–volume  
712 relationship during hypercapnia and hypocapnia in humans. Neuroimage 53,  
713 383-391. <https://doi.org/10.1016/j.neuroimage.2010.07.003>.

- 714 de Hollander, G., van der Zwaag, W., Qian, C., Zhang, P., Knapen, T., 2021. Ultra-  
715 high field fMRI reveals origins of feedforward and feedback activity within  
716 laminae of human ocular dominance columns. *Neuroimage*. 228, 117683.  
717 <https://doi.org/10.1016/j.neuroimage.2020.117683>.
- 718 De Martino, F., Zimmermann, J., Muckli, L., Ugurbil, K., Yacoub, E., Goebel, R.,  
719 2013. Cortical depth dependent functional responses in humans at 7T:  
720 improved specificity with 3D GRASE. *PLoS one* 8, e60514.  
721 <https://doi.org/10.1371/journal.pone.0060514>.
- 722 Dobre, M.C., Ugurbil, K., Marjanska, M., 2007. Determination of blood longitudinal  
723 relaxation time (T1) at high magnetic field strengths. *Magnetic Resonance*  
724 *Imaging*. 25, 733-735. <https://doi.org/10.1016/j.mri.2006.10.020>.
- 725 Douglas, R.J., Martin, K.A., 2004. Neuronal circuits of the neocortex. *Annu. Rev.*  
726 *Neurosci.* 27, 419-451.  
727 <https://doi.org/10.1146/annurev.neuro.27.070203.144152>.
- 728 Duann, J.-R., Jung, T.-P., Kuo, W.-J., Yeh, T.-C., Makeig, S., Hsieh, J.-C.,  
729 Sejnowski, T.J., 2002. Single-trial variability in event-related BOLD signals.  
730 *Neuroimage*. 15, 823-835. <https://doi.org/10.1006/nimg.2001.1049>.
- 731 Duvernoy, H.M., Delon, S., Vannson, J., 1981. Cortical blood vessels of the human  
732 brain. *Brain Research Bulletin*. 7, 519-579. [https://doi.org/10.1016/0361-](https://doi.org/10.1016/0361-9230(81)90007-1)  
733 [9230\(81\)90007-1](https://doi.org/10.1016/0361-9230(81)90007-1).
- 734 Finn, E.S., Huber, L., Jangraw, D.C., Molfese, P.J., Bandettini, P.A., 2019. Layer-  
735 dependent activity in human prefrontal cortex during working memory. *Nature*  
736 *Neuroscience*. 22, 1687-1695. <https://doi.org/10.1038/s41593-019-0487-z>.
- 737 Fischl, B., Dale, A.M., 2000. Measuring the thickness of the human cerebral cortex  
738 from magnetic resonance images. *Proceedings of the National Academy of*  
739 *Sciences*. 97, 11050-11055. <https://doi.org/10.1073/pnas.200033797>.
- 740 Fracasso, A., Luijten, P.R., Dumoulin, S.O., Petridou, N., 2018. Laminar imaging of  
741 positive and negative BOLD in human visual cortex at 7 T. *Neuroimage*. 164,  
742 100-111. <https://doi.org/10.1016/j.neuroimage.2017.02.038>.
- 743 Gagnon, L., Sakadžić, S., Lesage, F., Musacchia, J.J., Lefebvre, J., Fang, Q., Yücel,  
744 M.A., Evans, K.C., Mandeville, E.T., Cohen-Adad, J., 2015. Quantifying the  
745 microvascular origin of BOLD-fMRI from first principles with two-photon



- 746           microscopy and an oxygen-sensitive nanoprobe. *Journal of Neuroscience*. 35,  
747           3663-3675. <https://doi.org/10.1523/JNEUROSCI.3555-14.2015>.
- 748   Genois, É., Gagnon, L., Desjardins, M., 2020. Modeling of vascular space  
749           occupancy and BOLD functional MRI from first principles using real  
750           microvascular angiograms. *Magnetic Resonance in Medicine*. 85, 456-468.  
751           <https://doi.org/10.1002/mrm.28429>.
- 752   Goense, J., Merkle, H., Logothetis, N.K., 2012. High-resolution fMRI reveals laminar  
753           differences in neurovascular coupling between positive and negative BOLD  
754           responses. *Neuron*. 76, 629-639.  
755           <https://doi.org/10.1016/j.neuron.2012.09.019>.
- 756   Goense, J.B., Logothetis, N.K., 2006. Laminar specificity in monkey V1 using high-  
757           resolution SE-fMRI. *Magnetic Resonance Imaging*. 24, 381-392.  
758           <https://doi.org/10.1016/j.mri.2005.12.032>.
- 759   Griffeth, V.E., Simon, A.B., Buxton, R.B., 2015. The coupling of cerebral blood flow  
760           and oxygen metabolism with brain activation is similar for simple and complex  
761           stimuli in human primary visual cortex. *Neuroimage*. 104, 156-162.  
762           <https://doi.org/10.1016/j.neuroimage.2014.10.003>.
- 763   Griswold, M.A., Jakob, P.M., Heidemann, R.M., Nittka, M., Jellus, V., Wang, J.,  
764           Kiefer, B., Haase, A., 2002. Generalized autocalibrating partially parallel  
765           acquisitions (GRAPPA). *Magnetic Resonance in Medicine*. 47, 1202-1210.  
766           <https://doi.org/10.1002/mrm.10171>.
- 767   Grubb, R.L., Raichle, M.E., Eichling, J.O., Ter-Pogossian, M.M., 1974. The effects of  
768           changes in PaCO<sub>2</sub> cerebral blood volume, blood flow, and vascular mean  
769           transit time. *Stroke*. 5, 630-639. <https://doi.org/10.1161/01.STR.5.5.630>.
- 770   Handwerker, D.A., Ollinger, J.M., D'Esposito, M., 2004. Variation of BOLD  
771           hemodynamic responses across subjects and brain regions and their effects  
772           on statistical analyses. *Neuroimage*. 21, 1639-1651.  
773           <https://doi.org/10.1016/j.neuroimage.2003.11.029>.
- 774   Havlicek, M., Uludağ, K., 2020. A dynamical model of the laminar BOLD response.  
775           *Neuroimage*. 204, 116209. <https://doi.org/10.1016/j.neuroimage.2019.116209>.
- 776   Heinzle, J., Koopmans, P.J., den Ouden, H.E., Raman, S., Stephan, K.E., 2016. A  
777           hemodynamic model for layered BOLD signals. *Neuroimage*. 125, 556-570.  
778           <https://doi.org/10.1016/j.neuroimage.2015.10.025>.

- 779 Hillman, E.M., Devor, A., Bouchard, M.B., Dunn, A.K., Krauss, G., Skoch, J.,  
780 Bacskai, B.J., Dale, A.M., Boas, D.A., 2007. Depth-resolved optical imaging  
781 and microscopy of vascular compartment dynamics during somatosensory  
782 stimulation. *Neuroimage*. 35, 89-104.  
783 <https://doi.org/10.1016/j.neuroimage.2006.11.032>.
- 784 Huber, L., Goense, J., Ivanov, D., Krieger, S., Turner, R., Moeller, H.E., 2013.  
785 Cerebral blood volume changes in negative BOLD regions during visual  
786 stimulation in humans at 7T. 21st Annual Meeting of the International Society  
787 for Magnetic Resonance in Medicine.
- 788 Huber, L., Goense, J., Kennerley, A.J., Ivanov, D., Krieger, S.N., Lepsien, J.,  
789 Trampel, R., Turner, R., Möller, H.E., 2014a. Investigation of the  
790 neurovascular coupling in positive and negative BOLD responses in human  
791 brain at 7 T. *Neuroimage*. 97, 349-362.  
792 <https://doi.org/10.1016/j.neuroimage.2014.04.022>.
- 793 Huber, L., Goense, J., Kennerley, A.J., Trampel, R., Guidi, M., Reimer, E., Ivanov,  
794 D., Neef, N., Gauthier, C.J., Turner, R., 2015. Cortical lamina-dependent  
795 blood volume changes in human brain at 7 T. *Neuroimage*. 107, 23-33.  
796 <https://doi.org/10.1016/j.neuroimage.2014.11.046>.
- 797 Huber, L., Handwerker, D.A., Jangraw, D.C., Chen, G., Hall, A., Stüber, C.,  
798 Gonzalez-Castillo, J., Ivanov, D., Marrett, S., Guidi, M., 2017a. High-  
799 resolution CBV-fMRI allows mapping of laminar activity and connectivity of  
800 cortical input and output in human M1. *Neuron*. 96, 1253-1263. e1257.  
801 <https://doi.org/10.1016/j.neuron.2017.11.005>.
- 802 Huber, L., Ivanov, D., Handwerker, D.A., Marrett, S., Guidi, M., Uludağ, K.,  
803 Bandettini, P.A., Poser, B.A., 2016. Techniques for blood volume fMRI with  
804 VASO: from low-resolution mapping towards sub-millimeter layer-dependent  
805 applications. *Neuroimage*. <https://doi.org/10.1016/j.neuroimage.2016.11.039>.
- 806 Huber, L., Ivanov, D., Krieger, S.N., Streicher, M.N., Mildner, T., Poser, B.A., Möller,  
807 H.E., Turner, R., 2014b. Slab-selective, BOLD-corrected VASO at 7 Tesla  
808 provides measures of cerebral blood volume reactivity with high signal-to-  
809 noise ratio. *Magnetic Resonance in Medicine*. 72, 137-148.  
810 <https://doi.org/10.1002/mrm.24916>.

- 811 Huber, L., Uludağ, K., Möller, H.E., 2017b. Non-BOLD contrast for laminar fMRI in  
812 humans: CBF, CBV, and CMRO2. *Neuroimage*.  
813 <https://doi.org/10.1016/j.neuroimage.2017.07.041>.
- 814 Huber, L.R., Poser, B.A., Bandettini, P.A., Arora, K., Wagstyl, K., Cho, S., Goense,  
815 J., Nothnagel, N., Morgan, A.T., van den Hurk, J., 2021. LAYNII: a software  
816 suite for layer-fMRI. *Neuroimage* 237, 118091.  
817 <https://doi.org/10.1016/j.neuroimage.2021.118091>.
- 818 Ito, H., Ibaraki, M., Kanno, I., Fukuda, H., Miura, S., 2005. Changes in the arterial  
819 fraction of human cerebral blood volume during hypercapnia and hypocapnia  
820 measured by positron emission tomography. *Journal of Cerebral Blood Flow*  
821 *& Metabolism*. 25, 852-857. <https://doi.org/10.1038%2Fsj.icbfm.9600076>.
- 822 Ito, H., Kanno, I., Iida, H., Hatazawa, J., Shimosegawa, E., Tamura, H., Okudera, T.,  
823 2001. Arterial fraction of cerebral blood volume in humans measured by  
824 positron emission tomography. *Annals of Nuclear Medicine*. 15, 111-116.  
825 <https://doi.org/10.1007/BF02988600>.
- 826 Jin, T., Kim, S.-G., 2006. Spatial dependence of CBV-fMRI: a comparison between  
827 VASO and contrast agent based methods. 2006 International Conference of  
828 the IEEE Engineering in Medicine and Biology Society. IEEE, pp. 25-28.  
829 <https://doi.org/10.1109/IEMBS.2006.259553>.
- 830 Jin, T., Kim, S.-G., 2008a. Cortical layer-dependent dynamic blood oxygenation,  
831 cerebral blood flow and cerebral blood volume responses during visual  
832 stimulation. *Neuroimage*. 43, 1-9.  
833 <https://doi.org/10.1016/j.neuroimage.2008.06.029>.
- 834 Jin, T., Kim, S.-G., 2008b. Improved cortical-layer specificity of vascular space  
835 occupancy fMRI with slab inversion relative to spin-echo BOLD at 9.4 T.  
836 *Neuroimage*. 40, 59-67. <https://doi.org/10.1016/j.neuroimage.2007.11.045>.
- 837 Kashyap, S., Ivanov, D., Havlicek, M., Poser, B.A., Uludağ, K., 2018. Impact of  
838 acquisition and analysis strategies on cortical depth-dependent fMRI.  
839 *Neuroimage* 168, 332-344. <https://doi.org/10.1016/j.neuroimage.2018.02.027>.
- 840 Kim, S.G., Hendrich, K., Hu, X., Merkle, H., Uğurbil, K., 1994. Potential pitfalls of  
841 functional MRI using conventional gradient-recalled echo techniques. *NMR in*  
842 *Biomedicine*. 7, 69-74. <https://doi.org/10.1002/nbm.1940070111>.

- 843 Kim, T., Kim, S.-G., 2010. Cortical layer-dependent arterial blood volume changes:  
844 improved spatial specificity relative to BOLD fMRI. *Neuroimage*. 49, 1340-  
845 1349. <https://doi.org/10.1016/j.neuroimage.2009.09.061>.
- 846 Kim, T., Kim, S.-G., 2011a. Suppl 1: Quantitative MRI of Cerebral Arterial Blood  
847 Volume. *The Open Neuroimaging Journal*. 5, 136.  
848 <https://dx.doi.org/10.2174%2F1874440001105010136>.
- 849 Kim, T., Kim, S.-G., 2011b. Temporal dynamics and spatial specificity of arterial and  
850 venous blood volume changes during visual stimulation: implication for BOLD  
851 quantification. *Journal of Cerebral Blood Flow & Metabolism*. 31, 1211-1222.  
852 <https://doi.org/10.1038%2Fjcbfm.2010.226>.
- 853 Klein, B.P., Fracasso, A., van Dijk, J.A., Paffen, C.L., Te Pas, S.F., Dumoulin, S.O.,  
854 2018. Cortical depth dependent population receptive field attraction by spatial  
855 attention in human V1. *Neuroimage* 176, 301-312.  
856 <https://doi.org/10.1016/j.neuroimage.2018.04.055>.
- 857 Koopmans, P.J., Barth, M., Norris, D.G., 2010. Layer-specific BOLD activation in  
858 human V1. *Human Brain Mapping*. 31, 1297-1304.  
859 <https://doi.org/10.1002/hbm.20936>.
- 860 Koopmans, P.J., Barth, M., Orzada, S., Norris, D.G., 2011. Multi-echo fMRI of the  
861 cortical laminae in humans at 7 T. *Neuroimage*. 56, 1276-1285.  
862 <https://doi.org/10.1016/j.neuroimage.2011.02.042>.
- 863 Lauwers, F., Cassot, F., Lauwers-Cances, V., Puwanarajah, P., Duvernoy, H., 2008.  
864 Morphometry of the human cerebral cortex microcirculation: general  
865 characteristics and space-related profiles. *Neuroimage*. 39, 936-948.  
866 <https://doi.org/10.1016/j.neuroimage.2007.09.024>.
- 867 Lawrence, S.J., Norris, D.G., De Lange, F.P., 2019. Dissociable laminar profiles of  
868 concurrent bottom-up and top-down modulation in the human visual cortex.  
869 *Elife*. 8, e44422. <https://doi.org/10.7554/eLife.44422>.
- 870 Light, K.C., Turner, J.R., Hinderliter, A.L., Sherwood, A., 1993. Race and gender  
871 comparisons: I. Hemodynamic responses to a series of stressors. *Health*  
872 *Psychology*. 12, 354. [https://psycnet.apa.org/doi/10.1037/0278-  
873 6133.12.5.354](https://psycnet.apa.org/doi/10.1037/0278-6133.12.5.354).

- 874 Lu, H., Golay, X., Pekar, J.J., van Zijl, P., 2003. Functional magnetic resonance  
875 imaging based on changes in vascular space occupancy. *Magnetic*  
876 *Resonance in Medicine*. 50, 263-274. <https://doi.org/10.1002/mrm.10519>.
- 877 Lu, H., Hua, J., Zijl, P., 2013. Noninvasive functional imaging of cerebral blood  
878 volume with vascular-space-occupancy (VASO) MRI. *NMR in Biomedicine*.  
879 26, 932-948. <https://doi.org/10.1002/nbm.2905>.
- 880 Mandeville, J.B., Marota, J.J., Ayata, C., Zaharchuk, G., Moskowitz, M.A., Rosen,  
881 B.R., Weisskoff, R.M., 1999. Evidence of a cerebrovascular postarteriole  
882 windkessel with delayed compliance. *Journal of Cerebral Blood Flow &*  
883 *Metabolism*. 19, 679-689. [https://doi.org/10.1097%2F00004647-199906000-](https://doi.org/10.1097%2F00004647-199906000-00012)  
884 [00012](https://doi.org/10.1097%2F00004647-199906000-00012).
- 885 Markuerkiaga, I., Barth, M., Norris, D.G., 2016. A cortical vascular model for  
886 examining the specificity of the laminar BOLD signal. *Neuroimage*. 132, 491-  
887 498. <https://doi.org/10.1016/j.neuroimage.2016.02.073>.
- 888 Markuerkiaga, I., Marques, J.P., Gallagher, T.E., Norris, D.G., 2021. Estimation of  
889 laminar BOLD activation profiles using deconvolution with a physiological  
890 point spread function. *Journal of Neuroscience Methods*. 353, 109095.  
891 <https://doi.org/10.1016/j.jneumeth.2021.109095>.
- 892 Marquardt, I., De Weerd, P., Schneider, M., Gulban, O.F., Ivanov, D., Wang, Y.,  
893 Uludağ, K., 2020. Feedback contribution to surface motion perception in the  
894 human early visual cortex. *Elife* 9, e50933.  
895 <https://doi.org/10.7554/eLife.50933>.
- 896 Marques, J.P., Kober, T., Krueger, G., van der Zwaag, W., Van de Moortele, P.-F.,  
897 Gruetter, R., 2010. MP2RAGE, a self bias-field corrected sequence for  
898 improved segmentation and T1-mapping at high field. *Neuroimage*. 49, 1271-  
899 1281. <https://doi.org/10.1016/j.neuroimage.2009.10.002>.
- 900 Norris, D.G., Polimeni, J.R., 2019. Laminar (f) MRI: A short history and future  
901 prospects. *Neuroimage*. <https://doi.org/10.1016/j.neuroimage.2019.04.082>.
- 902 O'Brien, K.R., Magill, A.W., Delacoste, J., Marques, J.P., Kober, T., Fautz, H.P.,  
903 Lazeyras, F., Krueger, G., 2014. Dielectric pads and low-adiabatic pulses:  
904 Complementary techniques to optimize structural T1w whole-brain MP2RAGE  
905 scans at 7 tesla. *Magnetic Resonance Imaging*. 40, 804-812.  
906 <https://doi.org/10.1002/jmri.24435>.

- 907 Obata, T., Liu, T.T., Miller, K.L., Luh, W.-M., Wong, E.C., Frank, L.R., Buxton, R.B.,  
908 2004. Discrepancies between BOLD and flow dynamics in primary and  
909 supplementary motor areas: application of the balloon model to the  
910 interpretation of BOLD transients. *Neuroimage*. 21, 144-153.  
911 <https://doi.org/10.1016/j.neuroimage.2003.08.040>.
- 912 Ogawa, S., Lee, T.-M., Kay, A.R., Tank, D.W., 1990. Brain magnetic resonance  
913 imaging with contrast dependent on blood oxygenation. *Proceedings of the*  
914 *National Academy of Sciences*. 87, 9868-9872.  
915 <https://doi.org/10.1073/pnas.87.24.9868>.
- 916 Oliveira, Í.A., van der Zwaag, W., Raimondo, L., Dumoulin, S.O., Siero, J.C., 2021a.  
917 Comparing hand movement rate dependence of cerebral blood volume and  
918 BOLD responses at 7T. *Neuroimage* 226, 117623.
- 919 Oliveira, Í.A., van der Zwaag, W., Raimondo, L., Dumoulin, S.O., Siero, J.C., 2021b.  
920 Comparing hand movement rate dependence of cerebral blood volume and  
921 BOLD responses at 7T. *Neuroimage*. 226, 117623.  
922 <https://doi.org/10.1016/j.neuroimage.2020.117623>.
- 923 Olman, C.A., Harel, N., Feinberg, D.A., He, S., Zhang, P., Ugurbil, K., Yacoub, E.,  
924 2012. Layer-specific fMRI reflects different neuronal computations at different  
925 depths in human V1. *PloS one*. 7, e32536.  
926 <https://doi.org/10.1371/journal.pone.0032536>.
- 927 Petridou, N., Siero, J.C., 2017. Laminar fMRI: What can the time domain tell us?  
928 *Neuroimage*. <https://doi.org/10.1016/j.neuroimage.2017.07.040>.
- 929 Polimeni, J.R., Fischl, B., Greve, D.N., Wald, L.L., 2010. Laminar analysis of 7 T  
930 BOLD using an imposed spatial activation pattern in human V1. *Neuroimage*.  
931 52, 1334-1346. <https://doi.org/10.1016/j.neuroimage.2010.05.005>.
- 932 Polimeni, J.R., Hinds, O.P., Balasubramanian, M., van der Kouwe, A., Wald, L.L.,  
933 Dale, A.M., Fischl, B., Schwartz, E.L., 2005. The human V1–V2–V3 visuotopic  
934 map complex measured via fMRI at 3 and 7 Tesla.
- 935 Polimeni, J.R., Renvall, V., Zaretskaya, N., Fischl, B., 2018. Analysis strategies for  
936 high-resolution UHF-fMRI data. *Neuroimage*. 168, 296-320.  
937 <https://doi.org/10.1016/j.neuroimage.2017.04.053>.
- 938 Poplawsky, A.J., Fukuda, M., Murphy, M., Kim, S.-G., 2015. Layer-specific fMRI  
939 responses to excitatory and inhibitory neuronal activities in the olfactory bulb.

- 940 Journal of Neuroscience. 35, 15263-15275.  
941 <https://doi.org/10.1523/JNEUROSCI.1015-15.2015>.
- 942 Poplawsky, A.J., Kim, S.-G., 2014. Layer-dependent BOLD and CBV-weighted fMRI  
943 responses in the rat olfactory bulb. Neuroimage. 91, 237-251.  
944 <https://doi.org/10.1016/j.neuroimage.2013.12.067>.
- 945 Poser, B.A., Koopmans, P.J., Witzel, T., Wald, L.L., Barth, M., 2010. Three  
946 dimensional echo-planar imaging at 7 Tesla. Neuroimage. 51, 261-266.  
947 <https://doi.org/10.1016/j.neuroimage.2010.01.108>.
- 948 Ress, D., Glover, G.H., Liu, J., Wandell, B., 2007. Laminar profiles of functional  
949 activity in the human brain. Neuroimage. 34, 74-84.  
950 <https://doi.org/10.1016/j.neuroimage.2006.08.020>.
- 951 Schmid, F., Barrett, M.J., Jenny, P., Weber, B., 2019. Vascular density and  
952 distribution in neocortex. Neuroimage.  
953 <https://doi.org/10.1016/j.neuroimage.2017.06.046>.
- 954 Self, M.W., van Kerkoerle, T., Goebel, R., Roelfsema, P.R., 2017. Benchmarking  
955 laminar fMRI: neuronal spiking and synaptic activity during top-down and  
956 bottom-up processing in the different layers of cortex. Neuroimage.  
957 <https://doi.org/10.1016/j.neuroimage.2017.06.045>.
- 958 Shih, Y.-Y.I., Chen, Y.-Y., Lai, H.-Y., Kao, Y.-C.J., Shyu, B.-C., Duong, T.Q., 2013.  
959 Ultra high-resolution fMRI and electrophysiology of the rat primary  
960 somatosensory cortex. Neuroimage. 73, 113-120.  
961 <https://doi.org/10.1016/j.neuroimage.2013.01.062>.
- 962 Silva, A.C., Koretsky, A.P., 2002. Laminar specificity of functional MRI onset times  
963 during somatosensory stimulation in rat. Proceedings of the National  
964 Academy of Sciences. 99, 15182-15187.  
965 <https://doi.org/10.1073/pnas.222561899>.
- 966 Silva, A.C., Koretsky, A.P., Duyn, J.H., 2007. Functional MRI impulse response for  
967 BOLD and CBV contrast in rat somatosensory cortex. Magnetic Resonance in  
968 Medicine. 57, 1110-1118. <https://doi.org/10.1002/mrm.21246>.
- 969 Stefanovic, B., Pike, G.B., 2005. Venous refocusing for volume estimation: VERVE  
970 functional magnetic resonance imaging. Magnetic Mesonance in Medicine.  
971 53, 339-347. <https://doi.org/10.1002/mrm.20352>.

- 972 Stephan, K.E., Petzschner, F.H., Kasper, L., Bayer, J., Wellstein, K.V., Stefanics, G.,  
973 Pruessmann, K.P., Heinzle, J., 2019. Laminar fMRI and computational  
974 theories of brain function. *Neuroimage*. 197, 699-706.  
975 <https://doi.org/10.1016/j.neuroimage.2017.11.001>.
- 976 Takano, T., Tian, G.-F., Peng, W., Lou, N., Libionka, W., Han, X., Nedergaard, M.,  
977 2006. Astrocyte-mediated control of cerebral blood flow. *Nature*  
978 *Neuroscience*. 9, 260. <https://doi.org/10.1038/nn1623>.
- 979 Turner, R., 2002. How much cortex can a vein drain? Downstream dilution of  
980 activation-related cerebral blood oxygenation changes. *Neuroimage*. 16,  
981 1062-1067. <https://doi.org/10.1006/nimg.2002.1082>.
- 982 Uludağ, K., Müller-Bierl, B., Uğurbil, K., 2009. An integrative model for neuronal  
983 activity-induced signal changes for gradient and spin echo functional imaging.  
984 *Neuroimage*. 48, 150-165. <https://doi.org/10.1016/j.neuroimage.2009.05.051>.
- 985 van Dijk, J.A., Fracasso, A., Petridou, N., Dumoulin, S.O., 2020. Linear systems  
986 analysis for laminar fMRI: Evaluating BOLD amplitude scaling for luminance  
987 contrast manipulations. *Scientific Reports*. 10, 1-15.  
988 <https://doi.org/10.1038/s41598-020-62165-x>.
- 989 Van Kerkoerle, T., Self, M.W., Roelfsema, P.R.J.N.c., 2017. Layer-specificity in the  
990 effects of attention and working memory on activity in primary visual cortex.  
991 *Nature Communications*. 8, 1-14. [10.1038/ncomms13804](https://doi.org/10.1038/ncomms13804).
- 992 Vanzetta, I., Hildesheim, R., Grinvald, A., 2005. Compartment-resolved imaging of  
993 activity-dependent dynamics of cortical blood volume and oximetry. *Journal of*  
994 *Neuroscience*. 25, 2233-2244. [https://doi.org/10.1523/JNEUROSCI.3032-](https://doi.org/10.1523/JNEUROSCI.3032-04.2005)  
995 [04.2005](https://doi.org/10.1523/JNEUROSCI.3032-04.2005).
- 996 Vizioli, L., De Martino, F., Petro, L.S., Kersten, D., Ugurbil, K., Yacoub, E., Muckli, L.,  
997 2020. Multivoxel Pattern of Blood Oxygen Level Dependent Activity can be  
998 sensitive to stimulus specific fine scale responses. *Scientific Reports*. 10, 1-  
999 18. <https://doi.org/10.1038/s41598-020-64044-x>.
- 1000 Waehnert, M., Dinse, J., Weiss, M., Streicher, M.N., Waehnert, P., Geyer, S., Turner,  
1001 R., Bazin, P.-L., 2014. Anatomically motivated modeling of cortical laminae.  
1002 *Neuroimage*. 93, 210-220. <https://doi.org/10.1016/j.neuroimage.2013.03.078>.



- 1003 Weber, B., Keller, A.L., Reichold, J., Logothetis, N.K., 2008. The microvascular  
1004 system of the striate and extrastriate visual cortex of the macaque. *Cerebral*  
1005 *Cortex*. 18, 2318-2330. <https://doi.org/10.1093/cercor/bhm259>.
- 1006 Yablonskiy, D.A., Haacke, E.M., 1994. Theory of NMR signal behavior in  
1007 magnetically inhomogeneous tissues: the static dephasing regime. *Magnetic*  
1008 *Resonance in Medicine*. 32, 749-763.  
1009 <https://doi.org/10.1002/mrm.1910320610>.
- 1010 Yu, X., Qian, C., Chen, D.-y., Dodd, S.J., Koretsky, A.P., 2014. Deciphering laminar-  
1011 specific neural inputs with line-scanning fMRI. *Nature Methods*. 11, 55.  
1012 <https://doi.org/10.1038/nmeth.2730>.
- 1013 Zaretskaya, N., Bause, J., Polimeni, J.R., Grassi, P.R., Scheffler, K., Bartels, A.,  
1014 2020. Eye-selective fMRI activity in human primary visual cortex: Comparison  
1015 between 3 T and 9.4 T, and effects across cortical depth. *Neuroimage*. 220,  
1016 117078. <https://doi.org/10.1016/j.neuroimage.2020.117078>.
- 1017 Zhang, X., Petersen, E.T., Ghariq, E., De Vis, J., Webb, A., Teeuwisse, W.M.,  
1018 Hendrikse, J., Van Osch, M., 2013. In vivo blood T1 measurements at 1.5 T, 3  
1019 T, and 7 T. *Magnetic Resonance in Medicine* 70, 1082-1086.  
1020 <https://doi.org/10.1002/mrm.24550>.
- 1021 Zhao, F., Wang, P., Hendrich, K., Ugurbil, K., Kim, S.-G., 2006. Cortical layer-  
1022 dependent BOLD and CBV responses measured by spin-echo and gradient-  
1023 echo fMRI: insights into hemodynamic regulation. *Neuroimage*. 30, 1149-  
1024 1160. <https://doi.org/10.1016/j.neuroimage.2005.11.013>.
- 1025 Zweifach, B.W., Lipowsky, H.H., 1977. Quantitative studies of microcirculatory  
1026 structure and function. III. Microvascular hemodynamics of cat mesentery and  
1027 rabbit omentum. *Circulation Research*. 41, 380-390.  
1028 <https://doi.org/10.1161/01.RES.41.3.380>.
- 1029
