1           **Modelling the depth-dependent VASO and BOLD**  
2           **responses in human primary visual cortex**

3  
4  
5   Atena Akbari<sup>1</sup>, Saskia Bollmann<sup>1</sup>, Tonima S Ali<sup>2</sup>, and Markus Barth<sup>1, 3, 4</sup>

6           <sup>1</sup>Centre for Advanced Imaging, University of Queensland, Brisbane, Australia

7           <sup>2</sup>School of Biomedical Engineering, The University of Sydney, Sydney, Australia

8           <sup>3</sup>ARC Training Centre for Innovation in Biomedical Imaging Technology, The University of  
9           Queensland, Brisbane, Australia

10          <sup>4</sup>School of Information Technology and Electrical Engineering, The University of Queensland,  
11          Brisbane, Queensland, Australia

12

13 **Abstract**

14 Functional magnetic resonance imaging (fMRI) using blood-oxygenation-level-  
15 dependent (BOLD) contrast is a common method for studying human brain function  
16 non-invasively. Gradient-echo (GRE) BOLD is highly sensitive to the blood  
17 oxygenation change in blood vessels; however, the signal specificity can be degraded  
18 due to signal leakage from the activated lower layers to the superficial layers in depth-  
19 dependent (also called laminar or layer-specific) fMRI. Alternatively, physiological  
20 variables such as cerebral blood volume using VAScular-Space-Occupancy (VASO)  
21 measurements have shown higher spatial specificity compared to BOLD. To better  
22 understand the physiological mechanisms (e.g., blood volume and oxygenation  
23 change) and to interpret the measured depth-dependent responses we need models  
24 that reflect vascular properties at this scale. For this purpose, we adapted a “cortical  
25 vascular model” previously developed to predict the layer-specific BOLD signal  
26 change in human primary visual cortex to also predict layer-specific VASO response.  
27 To evaluate the model, we compared the predictions with experimental results of  
28 simultaneous VASO and BOLD measurements in a group of healthy participants.  
29 Fitting the model to our experimental findings provided an estimate of CBV change in  
30 different vascular compartments upon neural activity. We found that stimulus-evoked  
31 CBV changes mainly occur in intracortical arteries as well as small arterioles and  
32 capillaries and that the contribution from venules is small for a long stimulus (~30 sec).  
33 Our results confirm the notion that VASO contrast is less susceptible to large vessel  
34 effects compared to BOLD.

35

36

37

38 **Keywords**

39 Laminar fMRI, VASO, BOLD, cerebral blood volume, cortical layers, primary visual  
40 cortex, depth-dependent

41

42

## 43 **1 Introduction**

44 High-resolution functional magnetic resonance imaging (fMRI) offers the potential to  
45 measure depth-dependent hemodynamic responses, which can provide insights into  
46 cortical information processing and microcircuits of the human brain (Douglas et al.,  
47 2004; Lawrence et al., 2019; Stephan et al., 2017). Numerous studies have  
48 investigated the function of cortical layers using the blood-oxygenation-level-  
49 dependent (BOLD) contrast (Ogawa et al., 1990) in animals and humans (Chen et al.,  
50 2013; Goense et al., 2012; Goense et al., 2006; Koopmans et al., 2010; Polimeni et  
51 al., 2010; Poplawsky et al., 2015; Ress et al., 2007; Silva et al., 2002; Yu et al., 2014).  
52 Despite the high sensitivity of this technique, it suffers from limited specificity due to  
53 signal leakage in draining veins carrying blood from (activated) lower layers to  
54 superficial layers (Duvernoy et al., 1981; Kim et al., 1994; Turner, 2002). This low  
55 specificity was the motivation to develop non-BOLD contrast mechanisms, such as  
56 cerebral-blood-volume (CBV) imaging, which is expected to be predominantly  
57 sensitive to hemodynamic responses in the microvasculature (Gagnon et al., 2015;  
58 Vanzetta et al., 2005).

59 A non-invasive method for CBV imaging is vascular-space-occupancy (VASO) (Lu et  
60 al., 2003), which takes advantage of the difference in blood and tissue  $T_1$  to image the  
61 tissue signal while the blood signal is nulled (Huber, 2014; Lu et al., 2003). Since the  
62 development of this contrast and its translation to 7T (Huber et al., 2014), several  
63 studies in animals and humans have been conducted in the areas of method  
64 development (Beckett et al., 2019; Chai et al., 2019; Huber, 2011), analysis strategies  
65 (Huber et al., 2020; Polimeni et al., 2018), and applications to cognitive neuroscience  
66 (Finn et al., 2019; Kashyap et al., 2016; Van Kerkoerle et al., 2017). However, to  
67 interpret the experimental results and account for both neural and vascular  
68 contributions to the fMRI signal, detailed models are required (Buxton et al., 2004).  
69 Several studies have modelled the BOLD response for both low- and high-resolution  
70 acquisitions (Buxton et al., 2004; Buxton et al., 1998; Genois et al., 2020; Havlicek et  
71 al., 2019; Heinzle et al., 2016; Markuerkiaga et al., 2016; Uludağ et al., 2009). Given  
72 the potential of VASO imaging for layer fMRI, we set out to model the depth-dependent  
73 VASO signal changes employing a detailed model of the underlying macro- and  
74 microvasculature (Markuerkiaga et al., 2016).

75 In this work, we adapted the recently developed “cortical vascular model”  
76 (Markuerkiaga et al., 2016) to simulate VASO responses in addition to BOLD  
77 responses at the laminar level. This model is based on histological observations in  
78 monkey’s primary visual cortex and considers various vascular features, such as  
79 vessel diameter, length, density, and distribution to simulate intra- and extra-vascular  
80 BOLD and VASO signals across cortical layers. We added intra-cortical (diving)  
81 arteries (ICAs) to the modelled region, as it is hypothesized that these play a role in  
82 the functional VASO response based on previous observations (Gagnon et al., 2015;  
83 Vanzetta et al., 2005). To fit the predictions of the now extended model to experimental  
84 data, we performed simultaneous BOLD and VASO imaging in a group of healthy  
85 participants with sub-millimetre resolution at 7T. The model fitting then provides  
86 estimates of CBV and oxygenation changes in microvascular (arterioles, capillaries,  
87 venules) and macrovascular (ICAs and intracortical veins (ICVs)) compartments at  
88 each cortical depth. Furthermore, we investigated the sensitivity of both VASO and  
89 BOLD contrasts to changes in the underlying physiological parameters, i.e., CBV and  
90 oxygenation. We found that both arterioles and capillaries as well as ICAs show  
91 considerable increase in CBV. A surprisingly wide range of CBV changes in the  
92 different micro- and macro-vascular compartments can result in similar depth-  
93 dependent profiles, indicating potential challenges when aiming to invert the measured  
94 profiles. Our results also suggest that the VASO contrast is less sensitive to the large  
95 blood vessels compared to BOLD, probably due to its linear relationship with CBV.  
96 In the following section, we briefly summarize the general structure of the previously  
97 developed cortical vascular model (2.1 and 2.2), and then describe the applied  
98 changes to simulate the VASO and BOLD responses (2.3).

## 99 **2 Theory and Simulations**

### 100 **2.1 The cortical vascular model**

101 The cortical vascular model developed by Markuerkiaga et al. (2016) simulates the  
102 steady-state BOLD response in a depth-dependent manner in human primary visual  
103 cortex. The model divides the brain vasculature into two groups: (i) the  
104 microvasculature forming a network of randomly oriented arterioles, capillaries, and  
105 venules also called the laminar network; and (ii) the macrovasculature in the form of

106 intracortical veins (ICVs) that drain the microvasculature towards the cortical surface.  
107 The vessel distribution in the laminar network is 21% arterioles, 36% capillaries, and  
108 43% venules (Boas et al., 2008). The model investigates the effect of the ascending  
109 veins on the BOLD signal by calculating the diameter, blood velocity, and mass flux of  
110 the ICVs in each layer. To simulate the VASO response, diving arteries need to be  
111 added to the modelled region, as several studies have shown that dilation mainly  
112 occurs in arteries and arterioles (Gagnon et al., 2015; Kim et al., 2011b; Vanzetta et  
113 al., 2005). To do so, a vascular unit centered on two adjacent principal veins (V3 and  
114 V4), surrounded by an arterial ring is modelled in this work with an artery – vein ratio  
115 of 2 – 1 (Francis et al., 2009; Lauwers et al., 2008). Figure 1A shows a schematic of  
116 the modelled intracortical arteries and veins following Duvernoy et al. (1981), in which  
117 vessels are categorized based on their diameter and penetration depth.  
118 The diameter of the intracortical vessels in each depth is calculated following the steps  
119 described in Markuerkiaga et al. (2016). In brief, based on the mass conservation law,  
120 the incoming mass flux ( $p$ ) to the arteries should be equal to the outgoing flux from  
121 the veins in the modelled region at steady state. Similarly, the mass flux from each  
122 depth is the mass flux from within the microvasculature plus the mass flux in the  
123 macrovasculature from the previous layer. In general, the mass flux through vessels  
124 can be calculated as:

$$p = r^2 \cdot v, \quad \text{Equation 1}$$

125 where  $r$  is the vessel radius and  $v$  is the blood velocity. We can rewrite this as:

$$p = \frac{d^3}{4} \cdot \alpha, \quad \text{Equation 2}$$

126 assuming a linear relationship between vessel diameter  $d$  and blood velocity (Zweifach  
127 et al., 1977):

$$\alpha = \frac{v}{d}. \quad \text{Equation 3}$$

128

129

130 The mass flux  $p$  through a single capillary is calculated assuming  $d = 8 \mu\text{m}$  and  
131  $v = 1.6 \text{ mm/s}$  (Boas et al., 2008; Zweifach et al., 1977). Then,  $p$  through ICVs and  
132 ICAs present in each layer is calculated starting from the layer closest to the white-  
133 matter (WM) border based on the number of capillaries in that layer:

$$p_{\text{ICVs}} = \frac{N_{\text{cap}}}{N_{\text{ICVs}}} \cdot p_{\text{cap}}. \quad \text{Equation 4}$$

134 For the rest of the layers,  $p$  in each layer is the summation of the mass flux within that  
135 layer and the mass flux from the previous layer(s). The same calculation for ICVs  
136 applies for ICAs, but with twice the number of arteries (Schmid et al., 2017). The  $\alpha$   
137 values in pre- and post-capillaries compartments were calculated assuming  $d = 8 \mu\text{m}$   
138 and  $v = 2 \text{ mm/sec}$  in post-capillary and  $v = 4 \text{ mm/sec}$  in the pre-capillary segment of  
139 the vasculature (Zweifach et al., 1977). Then, based on the mass flux for each vessel  
140 at each layer, the vessel diameter and the blood velocity of the macrovasculature can  
141 be calculated using Equation 2 and Equation 3. Table 1 shows the estimated  
142 diameters of intracortical arteries and veins, which are in line with the values reported  
143 in Duvernoy et al. (1981).

144 The baseline blood volume of the laminar network taken from Weber et al. (2008) was  
145 interpolated to the number of voxels being simulated, resulting in 2-2.7% baseline CBV  
146 (Figure 1B). The intracortical baseline CBV is calculated as:

$$\text{CBV}_{\text{ICAs,ICVs}}^{\text{baseline}} = \pi \frac{d^2}{4} / l^2, \quad \text{Equation 5}$$

147 in which  $l$  is the simulated voxel length (0.75 mm) yielding a baseline CBV in ICVs  
148 ranging from 0.2-1.45% and a baseline CBV in ICAs ranging from 0.17-1.15% (Figure  
149 1C). The total baseline blood volume of the modelled vasculature including the laminar  
150 network, ICAs and ICVs is ranging from 2.78 to 4.61% (Figure 1D). These values are  
151 in agreement with Barrett et al. (2012), who, based on human and primate data,  
152 estimated that arteries make up  $\sim 29\%$  of total blood volume, and veins contribute  
153  $\sim 27\%$ . This vascular model is then combined with the MR signal model (see section  
154 2.2) to calculate the layer-dependent signal changes.

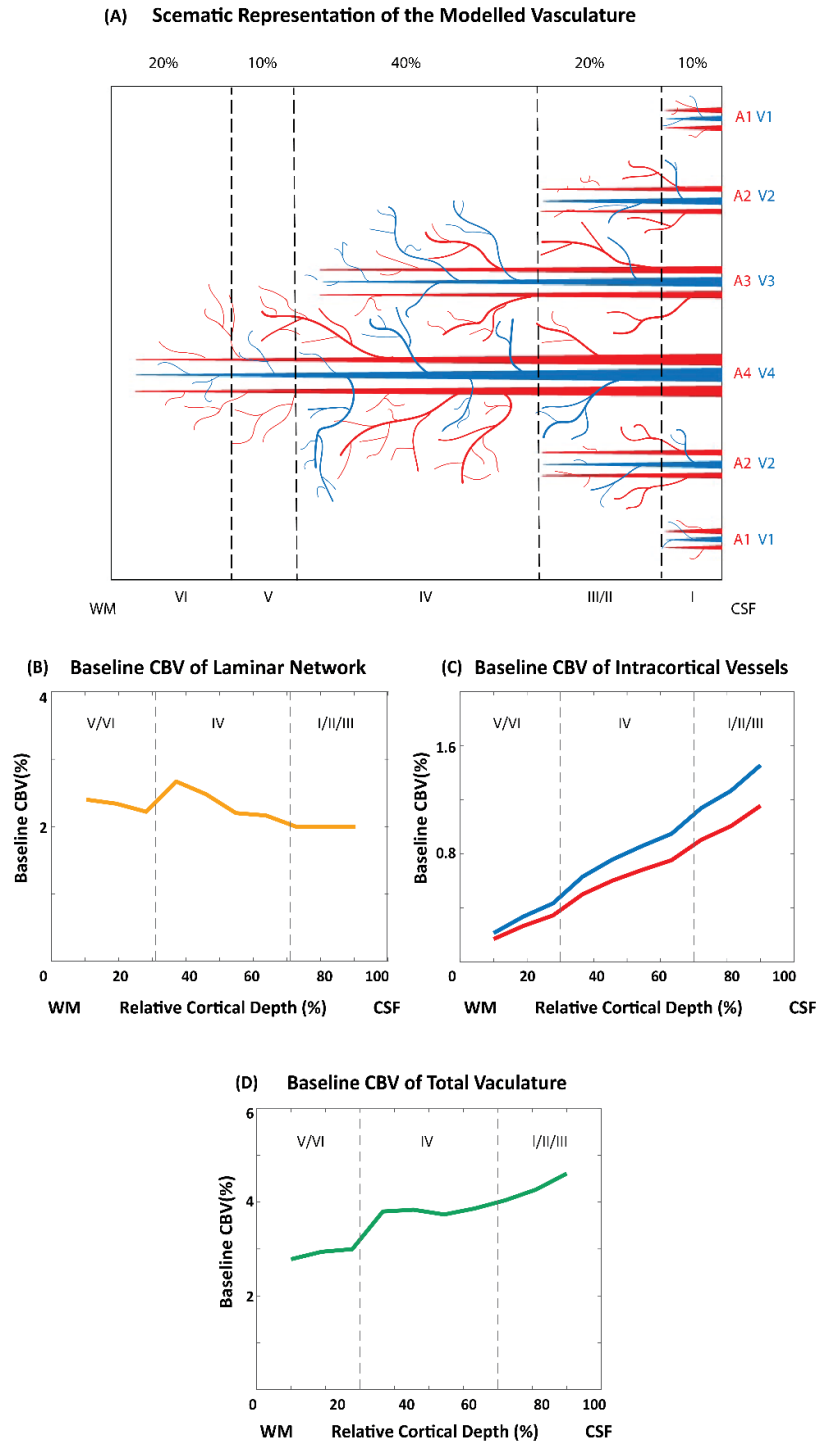

155

156 Figure 1: Vascular model of intracortical vessels and baseline cerebral blood volume of the different  
 157 vascular compartments. A) Schematic of the vascular features of the primary visual cortex illustrating  
 158 the 2 – 1 artery – vein ratio. B) Baseline blood volume of the lamina network (i.e., arterioles, capillaries,  
 159 venules) as a function of cortical depth following Weber et al. (2008). C) Estimated baseline blood  
 160 volume of the intracortical vessels (ICAs and ICAVs). D) Estimated baseline blood volume of the total  
 161 vasculature.

162

163 Table 1. The average diameter (in  $\mu\text{m}$ ) of intracortical arteries and veins in the modelled vascular unit  
 164 centred on two intermediate-sized veins (V3 and V4) and surrounded by four intermediate-sized arteries  
 165 (two A3 and two A4). For reference, the ICV diameters of group 1 to 4 reported in Duvernoy et al. (1981)  
 166 range from 20 to 65  $\mu\text{m}$ , and the diameter of the corresponding ICAs range from 10 to 40  $\mu\text{m}$ .

|                     | <b>V4</b> | <b>V3</b> | <b>V2</b> | <b>V1</b> | <b>A4</b> | <b>A3</b> | <b>A2</b> | <b>A1</b> |
|---------------------|-----------|-----------|-----------|-----------|-----------|-----------|-----------|-----------|
| <b>Layer I</b>      | 68.6      | 53.2      | 32.1      | 20.2      | 43.2      | 33.5      | 20.2      | 12.7      |
| <b>Layer II/III</b> | 67.5      | 51.5      | 26.1      |           | 42.6      | 32.4      | 16.5      |           |
| <b>Layer IV</b>     | 62.2      | 41.5      |           |           | 39.5      | 26.1      |           |           |
| <b>Layer V</b>      | 55.6      |           |           |           | 35.1      |           |           |           |
| <b>Layer VI</b>     | 44.0      |           |           |           | 27.7      |           |           |           |

167

## 168 **2.2 BOLD and VASO MR signal models**

169 The MR signal model employed here is a steady state model contrasting signal levels  
 170 at baseline and during activity (Markuerkiaga et al., 2016; Uludağ et al., 2009). At  
 171 baseline, the total MR signal  $S_{\text{total}}^{\text{base}}$  is the sum of the intra-(IV) and extra-vascular (EV)  
 172 signal components (Buxton, 2009; Obata et al., 2004; Uludağ et al., 2009):

$$S_{\text{tot,base}} = (1 - \text{CBV}) \cdot S_{\text{EV,base}} + \sum_i S_{\text{IV,base},i} \cdot \text{CBV}_i, \quad \text{Equation 6}$$

173 where CBV is the baseline blood volume, and  $i$  denotes different vascular  
 174 compartments, i.e., arterioles, capillaries, venules, ICVs and ICAs. In the following, we  
 175 describe the intra- and extra-vascular BOLD and VASO signals when using a GRE  
 176 readout at 7T.

177 The BOLD signal is approximated as a mono-exponential decay (Yablonskiy et al.,  
 178 1994), where  $TE$  is the echo time,  $S_0$  the effective spin density at  $TE = 0$ , and  $R_2^*$  the  
 179 transverse relaxation rate:

$$S^{\text{BOLD}} = S_0 \cdot e^{-TE \cdot R_2^*}. \quad \text{Equation 7}$$

180

181



182 The transverse relaxation rate is the sum of the intrinsic ( $R_{2,0}^*$ ) and hemoglobin (Hb)-  
 183 induced transverse relaxation rates ( $R_{2,\text{Hb}}^*$ ):

$$R_2^* = R_{2,0}^* + R_{2,\text{Hb}}^* \quad \text{Equation 8}$$

184 All intrinsic and Hb-induced  $R_2^*$  values used in this model (Blockley et al., 2008; Uludağ  
 185 et al., 2009) are summarized in Table 2. Extra- and intra-vascular BOLD signals are  
 186 estimated using their corresponding relaxation rates. In short, the Hb-induced extra-  
 187 vascular relaxation rate is calculated according to the susceptibility-induced shift at the  
 188 surface of the vessel depending on the oxygenation level ( $Y$ ) (Uludağ et al., 2009).  
 189 The intra-vascular  $T_2^*$  of the ICVs (intrinsic and Hb-induced) are very small at high field  
 190 (7T and above). Therefore, the intra-vascular signal in veins approaches zero (Uludağ  
 191 et al., 2009), and the main intra-vascular contribution comes from the arterial and  
 192 capillary side of the vasculature.

193 Table 2: The intrinsic and Hb-induced intra- and extra-vascular transverse relaxation rates used in the  
 194 BOLD signal model.

|                       | Intrinsic                                | Hb-induced                                                                                                                                                                                   |
|-----------------------|------------------------------------------|----------------------------------------------------------------------------------------------------------------------------------------------------------------------------------------------|
| Intravascular (blood) | $R_{2,\text{IV},0}^*$ (s <sup>-1</sup> ) | $R_{2,\text{IV},\text{Hb}}^*$ (s <sup>-1</sup> )                                                                                                                                             |
|                       | 67                                       | $C \cdot (1 - Y)^2$                                                                                                                                                                          |
| Extravascular(tissue) | $R_{2,\text{EV},0}^*$ (s <sup>-1</sup> ) | $R_{2,\text{EV},\text{Hb}}^*$ (s <sup>-1</sup> )                                                                                                                                             |
|                       | 33.95                                    | $R_{2,\text{EV},\text{Hb}}^* = (e \cdot \Delta\nu_s + f) \cdot \text{CBV}_i$<br>$\Delta\nu_s = \frac{\Delta\chi}{4\pi} \cdot \text{Hct} \cdot ( Y_{\text{off}} - Y ) \cdot \gamma \cdot B_0$ |

$C$ : constant that depends on the magnetic field strength (= 536.48).

$\Delta\nu$ : the susceptibility-induced shift at the surface of the vessel corresponds to Larmor frequency shift (depends on  $Y$ ).

$\Delta\chi$ : the susceptibility of blood with fully deoxygenated blood (= 3.32).

$Y_{\text{off}}$ : the oxygenation level that produces no magnetic susceptibility difference between intravascular and extra-vascular fluids (= 95%).

$e = 0.0453$  and  $f = -0.19$ : fitting coefficients.

195

196

197 Following neural activity and changes in blood volume and oxygenation, the total  
 198 MRI signal is:

$$S_{\text{total,act}} = (1 - (\text{CBV} + \Delta\text{CBV}_{\text{act}})) \cdot S_{\text{EV,act}} + \sum_i S_{\text{IV,act}} \cdot (\text{CBV} + \Delta\text{CBV}_{\text{act},i}), \quad \text{Equation 9}$$

199 where  $\Delta\text{CBV}$  is the blood volume change upon activation. The increase in oxygenation  
 200 is reflected in the shortening of the relaxation rates, which leads to increased extra-  
 201 and intravascular signal levels. The BOLD signal change in percent (%) following  
 202 neural activity can be described as the signal difference between baseline and  
 203 activation, normalized to the baseline signal level:

$$\frac{\Delta S}{S_{\text{base}}} = \frac{S_{\text{tot,act}} - S_{\text{tot,base}}}{S_{\text{tot,base}}} \cdot 100 [\%], \quad \text{Equation 10}$$

204 For VASO, signal change arises only from the extravascular component, as the  
 205 intravascular signal is nulled with an inversion pulse. The steady state nulled tissue  
 206 signal is (Lu et al., 2003):

$$S_{\text{EV}}^{\text{nulled}} = S_0 \left( 1 - (1 + \varepsilon) e^{\frac{-\text{TI}}{T_1}} + \varepsilon e^{\frac{-\text{TR}}{T_1}} \right) \cdot e^{-\text{TE} \cdot R_2^*, \text{EV}}, \quad \text{Equation 11}$$

207 in which  $\varepsilon$  is the inversion efficiency (here assumed to be equal to 1),  $\text{TI}/T_1/\text{TR}$  are the  
 208 blood nulling time, longitudinal relaxation time, and repetition time, respectively. At the  
 209 time of the blood nulling, a BOLD signal contamination — the  $T_2^*$ -dependency — is still  
 210 present and needs to be corrected. The dynamic division approach proposed by Huber  
 211 et al. (2014) removes the  $T_2^*$ -contribution from the VASO signal by dividing the “nulled”  
 212 by the “non-nulled” signal, assuming equal BOLD contributions in both images:

$$S_{\text{EV}}^{\text{VASO}} = \frac{S_{\text{EV}}^{\text{nulled}}}{S_{\text{EV}}^{\text{non-nulled}}} = S_0 \left( 1 - (1 + \varepsilon) \cdot e^{\frac{\text{TI}}{T_1}} + \varepsilon \cdot e^{\frac{-\text{TR}}{T_1}} \right) \quad \text{Equation 12}$$

213

214

215 Then, the VASO signal during baseline, activity, and total VASO signal change can be  
216 derived from Equation 6, Equation 9, and Equation 10 by considering only the extra-  
217 vascular components:

$$\begin{aligned} S_{\text{tot,base}}^{\text{VASO}} &= (1 - \text{CBV}) \cdot S_{\text{EV}}^{\text{VASO}} \\ S_{\text{tot,act}}^{\text{VASO}} &= [1 - (\text{CBV} + \Delta\text{CBV})] \cdot S_{\text{EV}}^{\text{VASO}} \\ \frac{\Delta S_{\text{base}}^{\text{VASO}}}{S_{\text{base}}^{\text{VASO}}} &= \frac{-\Delta\text{CBV}}{1 - \text{CBV}} \end{aligned} \quad \text{Equation 13}$$

218 Thus, VASO signal changes are only a function of CBV change, and independent of  
219 oxygenation changes.

## 220 **2.3 Model Assumptions and Simulations**

221 To simulate depth-dependent BOLD and VASO signal changes, the cortical vascular  
222 model outlined in section 2.1 requires  $\Delta\text{CBV}$  and oxygenation values at baseline and  
223 activity for each depth and vascular compartment. Note that  $\Delta\text{CBV}$  here is given in  
224 percent of the baseline CBV, i.e., an increase of 100 % means that CBV during  
225 activation is twice as large as during baseline. Further, oxygenation is given in percent  
226 oxygen saturation, with 100% oxygenation corresponding to fully oxygenated blood.  
227 The resulting BOLD and VASO profiles are presented in percent signal change  
228 following equation Equation 10 and Equation 13.

229 To find the input values that best fit the empirical data (see section 3.2), we simulated  
230 numerous profiles for a wide range of input parameters (Table 3), and then calculated  
231 the root-mean-squared-error (RMSE) for each simulated profile with the experimental  
232 result. The minimum RMSE value indicates the highest similarity between simulated  
233 and measured depth-dependent responses. To investigate the effect of input  
234 parameters on the resulting depth-dependent profiles, we also plotted the range of  
235 profiles obtained with an RMSE 20% higher than the minimum RMSE and extracted  
236 the corresponding input values for  $\Delta\text{CBV}$  and oxygenation. For reference, we have  
237 included the original values used in Markuerkiaga et al. (2016) in square brackets in  
238 Table 3.

239 To account for partial volume effects across layers and provide a better comparison  
240 between simulated and measured depth-dependent responses (Markuerkiaga et al.,  
241 2016), we applied a smoothing kernel (Koopmans et al., 2011) to the simulated

242 profiles. The resulting zero-padded edges of the laminar profiles were thus excluded  
243 from the RMSE estimation, and only the central eight data points contributed.  
244 In the original version of the cortical vascular model, Markuerkiaga et al. (2016)  
245 assumed the same increase in CBV of 16.6% (Griffeth et al., 2015) in each  
246 compartment of the laminar network across all depths. Using these input values, the  
247 resulting depth-dependent VASO signal change (see Figure 7) did not exhibit the  
248 characteristic peak in the middle layers observed in our and other VASO experiments  
249 (Huber et al., 2013). We therefore assumed a non-uniform CBV change across layers.  
250 For the VASO simulations, we assumed in the laminar network a 1.5 times higher CBV  
251 increase in middle cortical layers (*IV*) compared with deep (*V* and *VI*) and superficial  
252 (*I* and *II/III*) layers following the ratio reported in Weber et al. (2008). In ICAs, we  
253 assumed higher CBV change in middle and upper cortical layers compared with the  
254 lower depths (see Figure 2). We then simulated VASO profiles using this ratio for a  
255 range of  $\Delta$ CBV values in the middle layers of 0 - 150 % for ICAs, arterioles, capillaries,  
256 and venules (Table 3). Note that we mostly let the  $\Delta$ CBV vary independently between  
257 the vascular compartments, but followed the original implementation considering  
258 arterioles and capillaries jointly. In addition, we assumed that the CBV change occurs  
259 exclusively in ICAs and the laminar network, and  $\Delta$ CBV in ascending veins remains  
260 negligible.

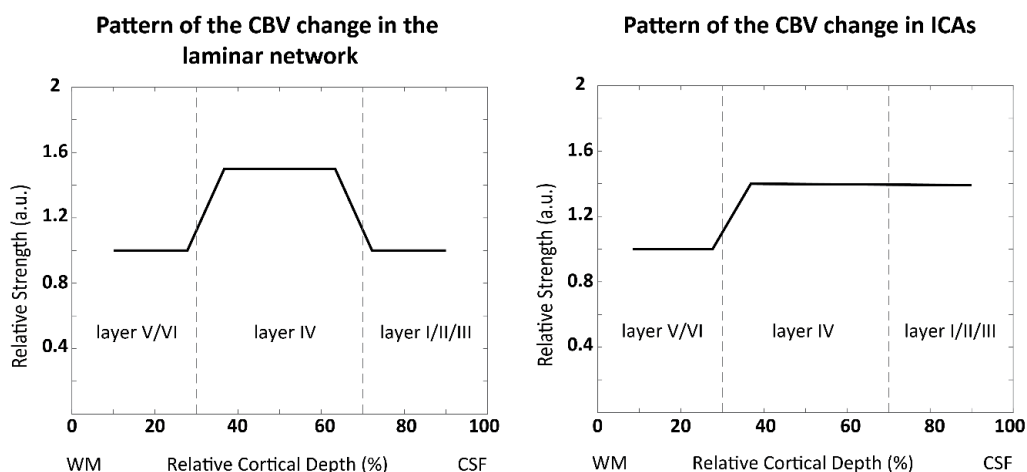

261

262 Figure 2: The pattern of the CBV change in the laminar network (left) and ICAs (right) across the layers  
263 used in our simulations. Following (Weber et al., 2008) we assumed that CBV change in superficial and  
264 deep layers is 2/3 of the CBV change in middle layers in the laminar network. In ICAs, the assumption  
265 is that the CBV change in deep layers is 2/3 of the change in middle and superficial layers.

266

267 For the BOLD simulations, we used the  $\Delta\text{CBV}$  values of the best fit from the VASO  
 268 experiment, and instead varied oxygenation values between 60-75% at baseline and  
 269 75-90% at activation in the venules and ICVs (see Table 1). Following Markuerkiaga  
 270 et al. (2016) and Uludağ et al. (2009), we assumed that ICAs, arterioles, and capillaries  
 271 are mostly oxygenated at baseline, and kept their oxygenation values fixed across  
 272 simulations. Again, we compared the resulting profiles to the experimental BOLD data  
 273 to obtain those input parameters that provided the best fit.

274 Table 3: The range of the model parameters for simulating VASO and BOLD depth-dependent  
 275 responses. Note that in the VASO simulations, we assumed that CBV change in arterioles and  
 276 capillaries is the same, but different from venules and ICAs, however the oxygenation change in  
 277 vascular components was considered to be different. The values in brackets refer to the values used in  
 278 the original vascular model.  $Y_{base}$  and  $Y_{act}$  are the blood oxygenation at baseline and activation, and  
 279  $\Delta\text{CBV}_{mid}$  refers to the CBV change in middle layers which is 1.5 times higher than CBV change in deep  
 280 and superficial layers.

|                          | Vascular Compartment |                   |                   |                  |              |
|--------------------------|----------------------|-------------------|-------------------|------------------|--------------|
|                          | arterioles           | capillaries       | venules           | ICVs             | ICAs         |
| $Y_{base}$               | 95%<br>[95 %]        | 85%<br>[85%]      | 60- 75*%<br>[60%] | 60-75*%<br>[60%] | 95%<br>--    |
| $Y_{act}$                | 100%<br>[100%]       | 95%<br>[95%]      | 75-90†%<br>[70%]  | 75-90†%<br>[70%] | 100%<br>--   |
| $\Delta\text{CBV}_{mid}$ | 0-150%<br>[16.6%]    | 0-150%<br>[16.6%] | 0-150%<br>[16.6%] | 0%<br>0%         | 0-150%<br>-- |

\*Corresponds to  $R_{2,IV}^* = 100.53 - 152.84 \text{ sec}^{-1}$

†Corresponds to  $R_{2,IV}^* = 72.37 - 100.53 \text{ sec}^{-1}$

281

282

## 283 **3 Experimental Methods**

### 284 **3.1 Model Implementation**

285 The cortical vascular model was implemented in MATLAB (2018b, The MathWorks,  
286 Inc.). The code is available on gitlab ([https://gitlab.com/AtenaAkbari/cortical-vascular-](https://gitlab.com/AtenaAkbari/cortical-vascular-model)  
287 [model](https://gitlab.com/AtenaAkbari/cortical-vascular-model)) including the original version used in Markuerkiaga et al. (2016) (branch:  
288 originalCode), the implementation used for an earlier version of this work presented at  
289 the ISMRM 2020 in which intracortical arteries were not yet added (Akbari et al., 2020)  
290 (branch: vasoSignal), and the implementation used in this manuscript (branch:  
291 master).

### 292 **3.2 Image Acquisition**

293 Imaging was performed on a 7T whole-body MR scanner (Siemens Healthcare,  
294 Erlangen, Germany), with a maximum gradient strength of 70 mT/m and a slew rate  
295 of 200 mT/m/s. A single-channel Tx and 32-channel Rx head coil array (Nova Medical,  
296 Wilmington, MA, USA) was used for radiofrequency transmission and signal reception.  
297 The slice-selective slab-inversion (SS-SI) VASO sequence (Huber et al., 2014) was  
298 employed to scan ten healthy participants (2 females; age range 19-32 years) after  
299 giving written informed consent according to the approval of the institutional ethics  
300 committee. For each subject, BOLD and VASO images were acquired in an  
301 interleaved fashion in three runs with 400 volumes in each run (19 minutes total  
302 acquisition time per run). The sequence parameters were: volume  $TR = 4.5s$ ,  $TE =$   
303  $25 ms$ ,  $TI = 650 ms$ , GRAPPA (Griswold et al., 2002) acceleration factor = 3,  
304 isotropic voxel size = 0.8, number of slices = 26, partial Fourier in the phase encoding  
305 direction = 6/8, in combination with a 3D EPI readout (Poser et al., 2010). The blood-  
306 nulling time was chosen based on the assumed value of blood  $T_1 = 2100 ms$  following  
307 earlier VASO studies at 7T (Huber et al., 2015; Huber et al., 2016; Zhang et al., 2013).  
308 The effective  $TI$  used in the sequence was the summation of the above-mentioned  $TI$   
309 and half of the readout duration. The visual stimulus consisted of 17 ON- and OFF-  
310 blocks with 30 s duration each. During the ON condition, a flashing black and white  
311 noise pattern was presented, and a fixation cross was the OFF condition of the  
312 stimulus (Polimeni et al., 2005). The imaging slices were positioned and oriented such

313 that the center of the imaging slab was aligned with the center of the calcarine sulcus,  
314 the part of the striate cortex with the highest vascular density in layer *IV* (Duvernoy et  
315 al., 1981). Whole-brain MP2RAGE images (Marques et al., 2010; O'Brien et al., 2014)  
316 were acquired with an isotropic resolution of 0.75 mm for each participant in the same  
317 session as the functional imaging.

### 318 **3.3 Image Analysis**

319 The first volume of each contrast was discarded to ensure  $T_1$  effects were at  
320 equilibrium. Dynamic division was then performed to account for the BOLD-  
321 contamination (Huber et al., 2014). The BOLD and BOLD-corrected VASO images  
322 were motion corrected using SPM12 (Wellcome Department, UK). Activation maps  
323 were estimated with the GLM analysis in SPM with no spatial smoothing. Data from  
324 three participants were discarded due to excessive motion, i.e., volume-to-volume  
325 displacement of more than one voxel size. Voxels with t-values above 2.3  
326 corresponding to an uncorrected significance level of  $p < 0.01$  were identified as the  
327 activated regions for both BOLD and BOLD-corrected VASO images.

328 For the layer analysis, we followed the steps outlined in Huber et al. (2014): The  $T_1$  –  
329 *EPI* images of each subject were used for manual WM/GM and GM/CSF boundary  
330 delineation. Then, this region-of-interest (ROI) in V1 was used to create ten equi-  
331 volume layers (Waehnert et al., 2014) using the open-source LAYNII package (Huber  
332 et al., 2020) and extract depth-dependent BOLD and VASO responses. The mean and  
333 standard error of the mean were calculated across participants, and average BOLD  
334 and VASO responses across all participants were used as a reference when  
335 evaluating the model predictions. Note that cortical layers in these analyses refer to a  
336 group of voxels obtained by dividing the ROI into 10 equi-volume layers and do not  
337 refer to the histological cortical layers. In the next section, we will first present the  
338 imaging results, and then introduce the simulations that fit these best. Further, we will  
339 present the simulated profiles with an RMSE 20% higher than the minimum RMSE,  
340 and the  $\Delta$ CBV and oxygenation values corresponding to these profiles.

## 341 **4 Results**

### 342 **4.1 Imaging**

343 The BOLD and VASO activation maps of all seven participants included in this study  
344 are shown in Figure 3. We observed overall higher t-values for the BOLD contrast  
345 compared to the VASO contrast. Further, highest t-values for BOLD are located at the  
346 cortical surface and within various sulci. In contrast, most of the VASO response is  
347 confined to the grey matter. An example of the ROI placed on V1 to extract the 10  
348 equi-volume layers and estimate the depth-dependent profiles is shown for one  
349 subject in Figure 3.

350 The depth-dependent BOLD and VASO signal changes for each participant as well as  
351 the mean and standard error of the mean of these profiles are shown in Figure 4. On  
352 average, we observed a mean signal change of 5.71% for BOLD and 1.07% for VASO,  
353 evidence for the larger effect size of the BOLD contrast. In agreement with previous  
354 studies, BOLD signal change peaks at the cortical surface (Koopmans et al., 2010;  
355 Olman et al., 2012; Polimeni et al., 2010) while the VASO signal change has its  
356 maximum in the middle cortical layers (Huber et al., 2013).



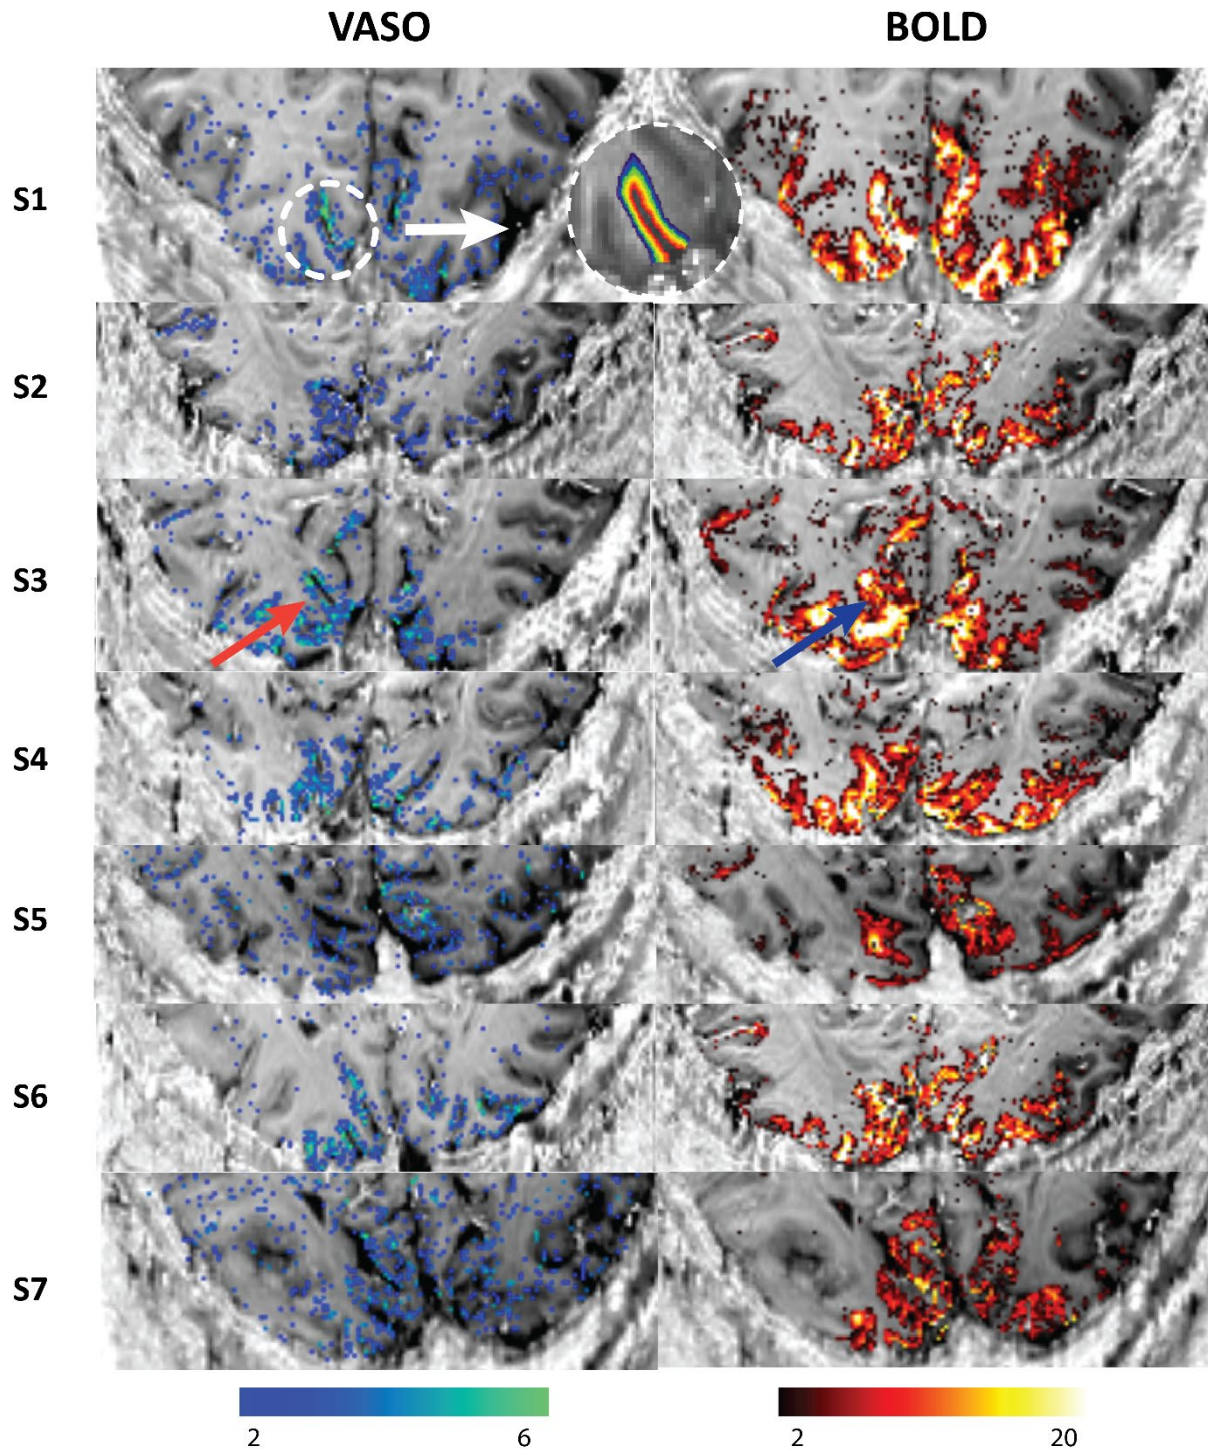

358 Figure 3: VASO and BOLD statistical activation maps of all participants in our study using the SS-SI  
359 VASO sequence (Huber et al., 2015) with an isotropic resolution of 0.8 mm. The activation maps are  
360 overlaid on T1-EPI images of each subject. The VASO contrast is more confined to GM while BOLD  
361 shows higher activity near surface (indicated with the blue and red arrows). An example of the region-  
362 of-interest (ROI) in V1 for the layer analysis is shown above. Ten equi-volume layers were extracted  
363 from GM in the T1-EPI images to calculate the mean signal change in each layer.

365

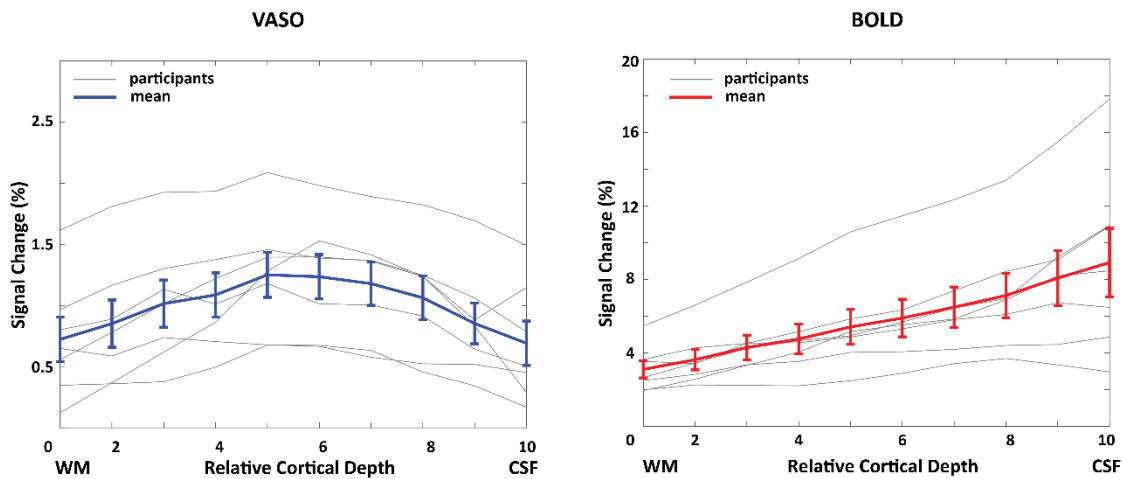

366

367 Figure 4: Depth-dependent VASO (absolute values) and BOLD signal changes in human V1 for each  
368 individual participant (gray) and averaged across all participants (blue and red). In this and all following  
369 graphs error bars refer to the standard error of the mean across all participants.

370

## 371 4.2 Simulations

372 The simulated VASO profile with the best fit is shown in Figure 5, and corresponding  
373 CBV changes are shown in Table 4. These agree with previous studies (Drew et al.,  
374 2011; Vanzetta et al., 2005) that have shown lower CBV change in venules compared  
375 with the CBV change in arterioles and capillaries when the stimulus duration is long  
376 ( $> 20$  sec). Using a Grubb value (Grubb et al., 1974) of 0.35, the corresponding CBF  
377 change upon activation in middle layers would be 63.2% in ICAs, 87.1% in arterioles  
378 and capillaries, and 49.6% in venules. For BOLD, the simulation with the best-fit yields  
379  $Y_{base} = 64\%$  and  $Y_{act} = 77\%$  in venules and ICVs. The minimum RMSE of the VASO  
380 and BOLD best fits are 0.08 and 1.03, respectively.

381

382 Table 4: CBV change in vascular compartments correspond to the best-fit show in Figure 5. The  
 383 minimum and maximum of the estimated CBV change in the 20% RMSE regime (i.e. the minimum  
 384 RMSE+20% of the minimum RMSE shown as the shaded area in Figure 5) are shown in brackets.

| <b><i>CBV change in vascular compartments</i></b> |                                     |                           |                         |
|---------------------------------------------------|-------------------------------------|---------------------------|-------------------------|
| <b><i>Cortical depth</i></b>                      | <b>Arterioles &amp; capillaries</b> | <b>venules</b>            | <b>ICAs</b>             |
| <b><i>Deep</i></b>                                | <b>45%</b><br>[0% 57%]              | <b>9%</b><br>[0% 79%]     | <b>18%</b><br>[8% 28%]  |
| <b><i>Middle</i></b>                              | <b>67.5%</b><br>[0% 85%]            | <b>13.5%</b><br>[0% 118%] | <b>27%</b><br>[12% 42%] |
| <b><i>superficial</i></b>                         | <b>45%</b><br>[0% 57%]              | <b>9%</b><br>[0% 79%]     | <b>27%</b><br>[12% 42%] |

385  
 386 To investigate the sensitivity of the model to the choice of input parameters, the  
 387 shaded area in Figure 5 illustrates the range of profiles with an RMSE up to 20% higher  
 388 than the minimum RMSE. The resulting profiles remain predominantly within the  
 389 standard error of the measured profiles. The corresponding input parameter ranges  
 390 are illustrated in Figure 6, which shows the RMSE values of simulated VASO and  
 391 BOLD profiles for different input parameter combinations. Note that the input  
 392 parameters for VASO simulations are  $\Delta CBV$  in ICAs, arterioles/capillaries, and the  
 393 venules of the laminar network, and the input for the BOLD simulation are blood  
 394 oxygenation values ( $Y$ ) during baseline and activation in the venules of the laminar  
 395 network and the ICVs. To illustrate the resulting 4D parameter space for VASO, three  
 396 intersections (2 input parameters + RMSE) at the point of the minimum RMSE are  
 397 shown. The white dotted lines indicate the range of RMSE values up to 20 % higher  
 398 than the minimum RMSE. Note how the diagonal band of minimal RMSE values in  
 399 Figure 6B is contained within this limit, which indicates a large number of possible  
 400  $\Delta CBV$  combinations would result in similar profiles, ranging from no change in CBV in  
 401 venules but 70 %  $\Delta CBV$  in arterioles and capillaries, to 100%  $\Delta CBV$  in venules but no  
 402 change in CBV of arterioles and capillaries. Smaller regions of minimal RMSE can be  
 403 found in Figure 6B and Figure 6C, indicating that a narrower range of  $\Delta CBV$   
 404 combinations would give rise to similar profiles for these parameter combinations. The  
 405 RMSE for the BOLD simulations with varying blood oxygenation values at baseline  
 406 and during activation is shown in Figure 6D. Again, the diagonal band enclosed by the

407 20 % RMSE limit indicates that various combinations of blood oxygenation values  
408 would result in similar profiles. A  $\Delta Y$  of approximately 18% between baseline and  
409 activation yields similar low RMSE values.

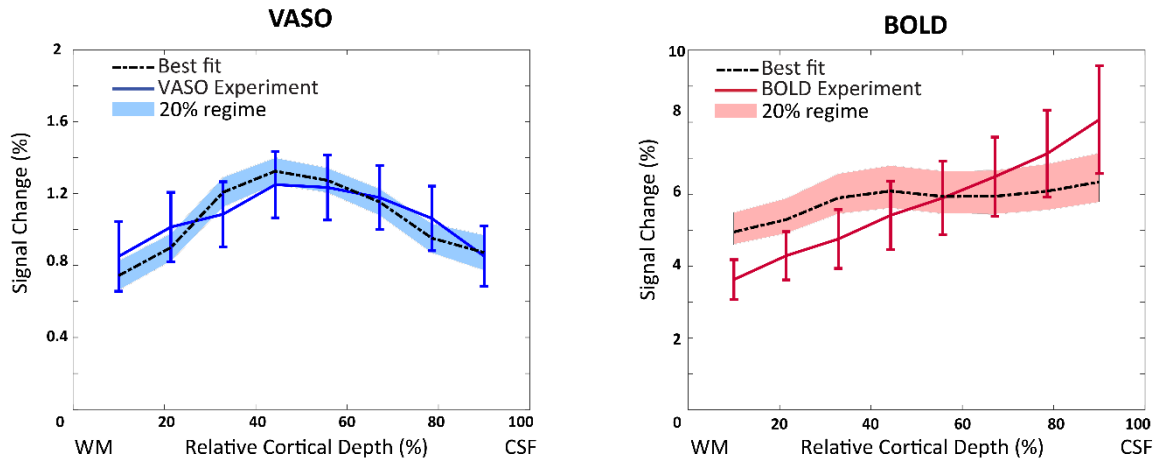

410

411 Figure 5: The measured VASO (left) and BOLD (right) profiles and the simulated profiles with the lowest  
412 RMSE (black line). Shaded area shows the VASO and BOLD simulated profiles with RMSE 20% higher  
413 than the minimum RMSE.

414

415

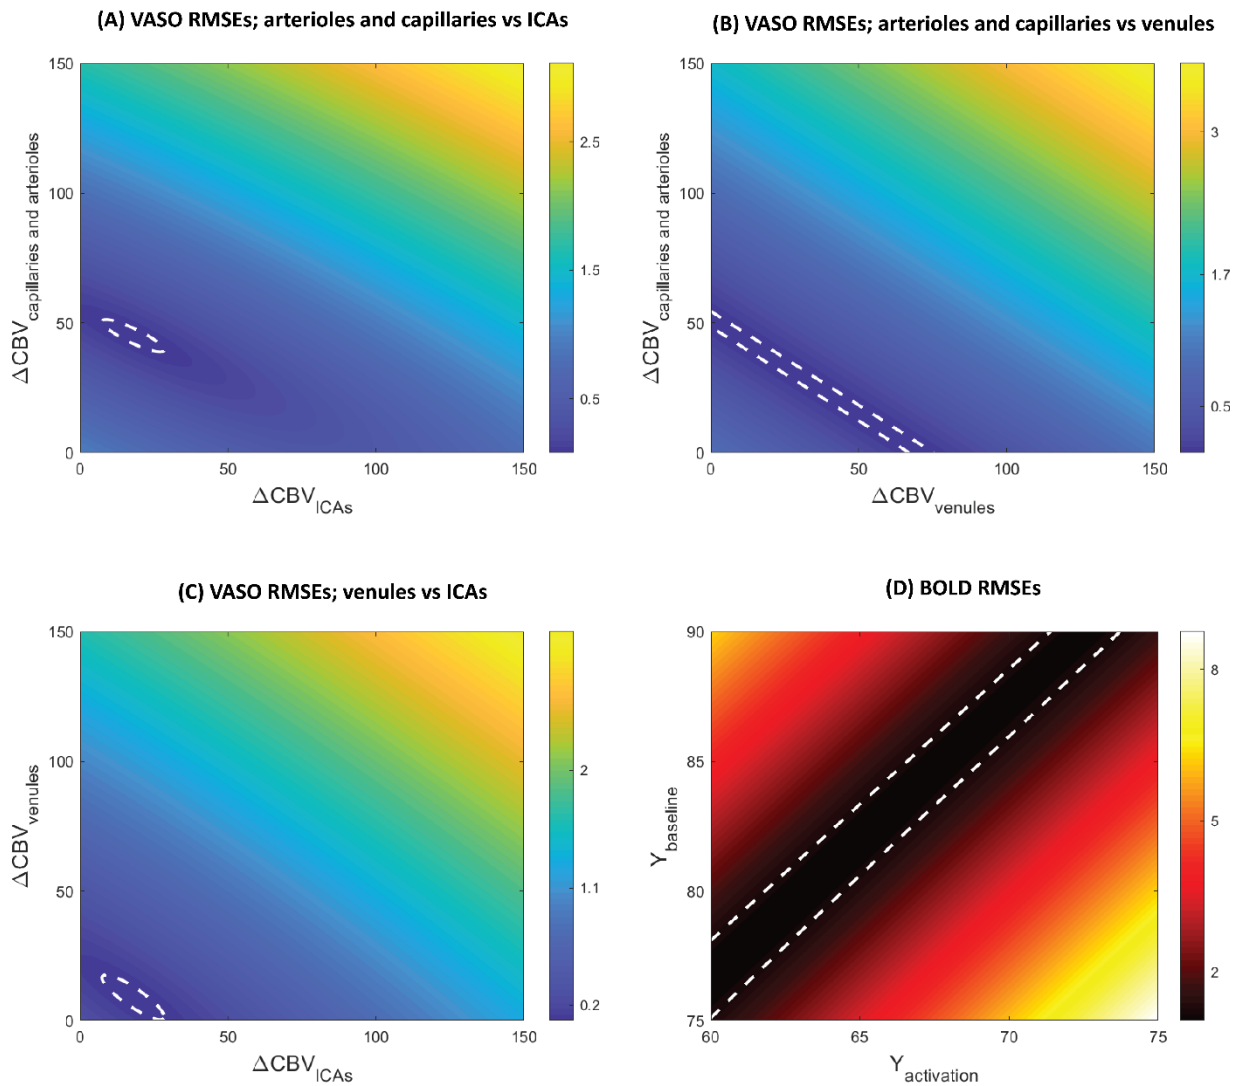

416

417 Figure 6: The root-mean-square-error (RMSE) values calculated as a measure of similarity between  
418 simulated and measured profiles. The white dotted lines refer to the RMSEs 20% higher than the  
419 minimum RMSE. (A) shows the RMSE when varying  $\Delta CBV$  in arterioles/capillaries and ICAs but keeping  
420 the  $\Delta CBV$  in venules at the value obtained from the profile with minimum RMSE. Similarly, (B) the  $\Delta CBV$   
421 in arterioles/capillaries and venules is varied but kept constant in the ICAs. (C) the RMSE is shown  
422 when varying the  $\Delta CBV$  in ICAs and venules but using the optimal value for the  $\Delta CBV$  in  
423 capillaries/arterioles. (D) BOLD RMSEs.

424 The simulation results of equal activation strength across layers, i.e., when all layers  
425 are equally activated and CBV change is the same for all vascular compartments as  
426 assumed in the original implementation, is shown in Figure 7. With this assumption,  
427 the VASO profile is much flatter and does not show higher CBV change in middle  
428 layers as expected (Goense et al., 2012; Poplawsky et al., 2014; Zhao et al., 2006)

429 due to the higher density of capillaries and metabolic responses. The best fit suggests  
430 48% CBV change in arterioles and capillaries, 26% in venules, and 24% in ICAs.  
431

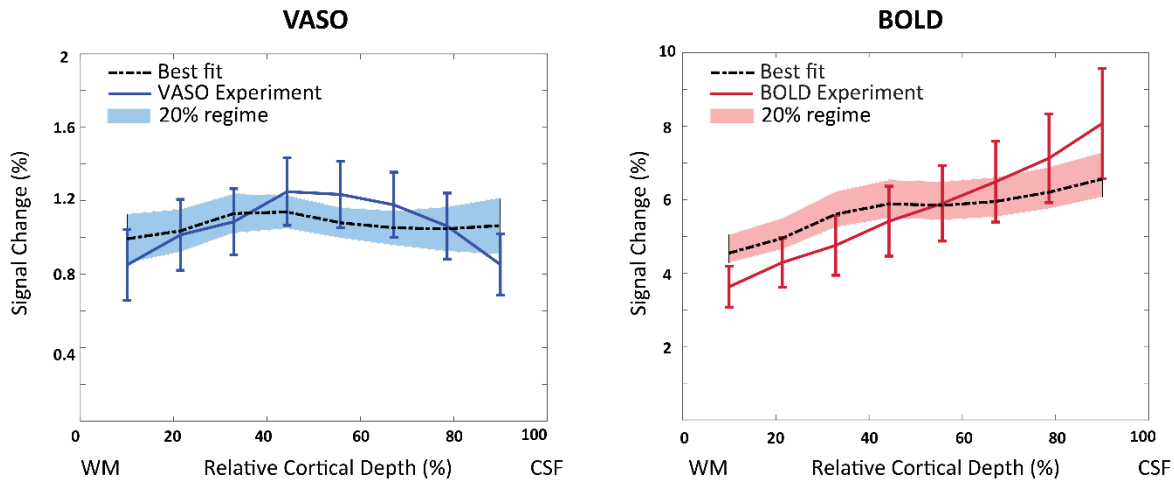

433 Figure 7: VASO and BOLD simulation results when the activation strength is equal across the layers.  
434 With this equal vascular response assumption, the simulated VASO response amplitude does not fit  
435 the experimental data well.

436 Figure 8 shows the uncorrected and BOLD-corrected simulated VASO signals along  
437 with the extra- and intra-vascular BOLD signals corresponding to the best fit. The  
438 BOLD contamination in the uncorrected VASO manifests as a signal increase near the  
439 cortical surface. When correcting for the  $T_2^*$ -dependency, the signal change peaks in  
440 the middle layers. The small intra-vascular BOLD signal change stems from the more  
441 oxygenated blood vessels, i.e., ICAs, arterioles and capillaries, and the extra-vascular  
442 BOLD signal increase near the surface is due to the dephasing of the tissue signal  
443 around venules and ICVs.

### Intra- and Extra-vascular signals

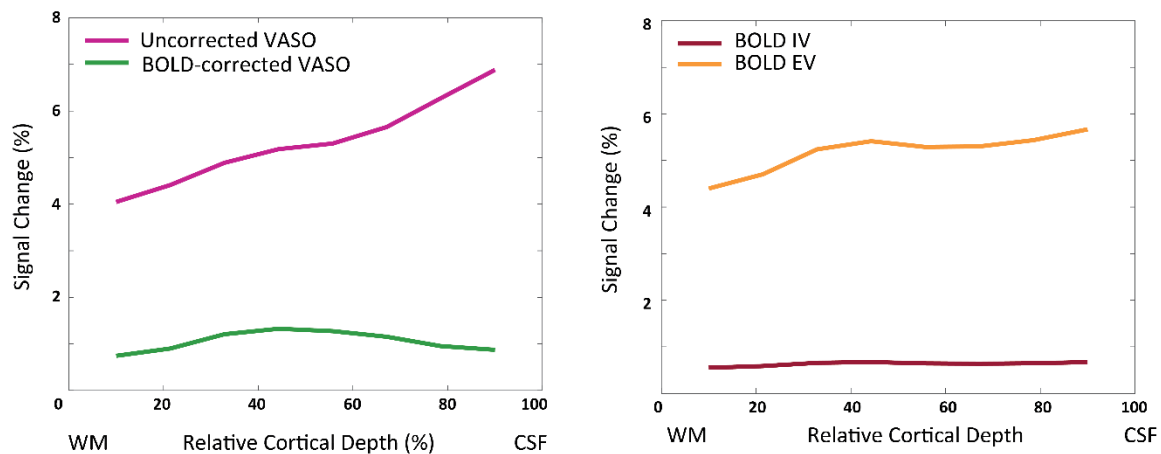

444

445 Figure 8: A) the uncorrected and BOLD-corrected simulated VASO profiles corresponding to the best  
446 fit. B) intra- and extra-vascular simulated BOLD signal correspond to the best fit.

## 447 5 Discussion and Conclusion

448 In this study, we adapted the cortical vascular model to simulate depth dependent  
449 VASO signal change in addition to BOLD signal change and added intra-cortical  
450 arteries to the modelled area for a full description of CBV changes in the intra-cortical  
451 vasculature. With our simulations, we found that stimulus evoked CBV changes are  
452 dominant in small arterioles and capillaries at around 67.5 % in steady state, and the  
453 contribution of venules is small at around 13.5 %. These estimates are in line with  
454 optical imaging studies performed in rodents, mice, and cats (Drew et al., 2011; Ma et  
455 al., 2016; Vanzetta et al., 2005) that reported the highest vascular response in  
456 arterioles and capillaries, while veins showed the smallest response. Several MR  
457 imaging studies (Gagnon et al., 2015; Hua et al., 2011; Jahanian et al., 2015; Jin et  
458 al., 2008b; Kim et al., 2007; Kim et al., 2010; Kim et al., 2011a; Vazquez et al., 2012)  
459 also reported higher CBV change in arterioles and smaller change in downstream  
460 vessels. The larger CBV change in arterioles and capillaries compared with  
461 intracortical arteries in our simulations, is also in line with Drew et al. (2011) and Gao  
462 et al. (2015) observations. We also found that a large range of CBV changes in the  
463 different vascular compartments resulted in similar CBV profiles (Figure 6), indicating  
464 a limited sensitivity of the VASO profile to small differences in CBV change. Overall,  
465 the cortical vascular model allows to estimate and compare BOLD and VASO changes  
466 in various conditions and resolve the contributions of different vascular compartments.

467 The inclusion of ICAs allowed us to investigate the sensitivity of the VASO signal to  
468 upstream CBV changes. Although we found a relatively large change in CBV of 27 %  
469 in ICAs, the measured and simulated profiles did not show the pial bias that is  
470 commonly found in BOLD profiles. This might be due to the different contrast  
471 mechanisms of VASO and BOLD, where the VASO signal is directly (linearly)  
472 proportional to CBV (Equation 13). Together with the low baseline blood volume in  
473 ICAs (Figure 1C), even a relatively large change in CBV in ICAs might thus only have  
474 a limited impact on the resulting VASO profile. In contrast, the extravascular signal  
475 contributions around venules and ICVs presumably amplify the effect of oxygenation  
476 changes in these vessels on the BOLD signal. Thus, the measured and simulated  
477 BOLD profiles are heavily skewed towards the signal stemming from ICVs. In  
478 conclusion, our results indicate that VASO contrast is less susceptible to large vessel  
479 effects compared to BOLD.

480 The various parameters used to build the cortical vascular model such as blood  
481 velocity, vessel diameter and baseline blood volume in capillaries were taken from  
482 previous research in cats, rabbits, and macaques (Markuerkiaga et al., 2016; Weber  
483 et al., 2008; Zweifach et al., 1977). We noticed that for certain parameter combinations  
484 the derived vessel diameters and blood velocities in the ICAs and ICVs can easily  
485 contradict previous reports that intracortical arteries have smaller diameter (Duvernoy  
486 et al., 1981) and fast blood velocities (Zweifach et al., 1977). Thus, while the cortical  
487 vascular model aims for a detailed description of the underlying micro- and macro-  
488 vasculature and its influence on the MR signal, many uncertainties in the specific  
489 parameter choices remain. One example includes the dilation profile of the ICAs  
490 across cortical depths, where we assumed a higher vascular response in middle and  
491 superficial layers (Figure 2). However, another possible scenario could be an equal  
492 vascular response in ICAs across the cortical depths (see the supplementary  
493 material), which results in similar depth-dependent VASO and BOLD profiles, but  
494 different estimated CBV changes (Figure S2). Additionally, the inter-individual  
495 variability in these parameters remains unknown, but may potentially have a large  
496 effect on the individual profiles given the many studies showing significant differences  
497 in hemodynamic responses between participants (Aguirre et al., 1998; Duann et al.,  
498 2002; Handwerker et al., 2004; Light et al., 1993). Consequently, a more detailed  
499 understanding of the relative impact of each of these parameters needs to be



500 developed, in combination with auxiliary image acquisitions that measure relevant  
501 underlying parameters (Hua et al., 2019).

502 The experimental results show similar profiles as expected from previous research  
503 (Huber et al., 2013; Huber et al., 2016; Jin et al., 2006, 2008a; Koopmans et al., 2010).

504 To ensure highest contrast-to-noise ratio when comparing with the simulations, we  
505 have averaged the responses across participants. We extracted percent signal change

506 values using a GLM, assuming the same hemodynamic response for all cortical layers.

507 Although each layer has a unique HRF (Petridou et al., 2017), we expect a negligible

508 bias in the estimated signal change due to the very long stimulus time employed here.

509 There is also evidence of the dependency of blood  $T_1$  on  $Hct$  levels (Dobre et al., 2007)

510 affecting the blood nulling time, though the effect can be considered negligible (Huber,

511 2011).

512 The vascular anatomical model used here presents a simplification of vascular  
513 anatomical networks (VAN) (Boas et al., 2008; Genois et al., 2020), but employs more

514 details in the micro- and macro-vasculature than the fully invertible model developed

515 by Havlicek et al. (2019). Thus, it is uniquely suited to translate new insights from

516 detailed VAN models developed in mice to the dynamic laminar models used to fit

517 human data. As exemplified in this work using changes in CBV, the impact of each

518 parameter on the resulting laminar profiles can be assessed individually, to then inform

519 the choice of acquisition, potential vascular biases, and the need for auxiliary

520 information. Next, the vascular anatomical model can be extended to other cortical

521 areas characterized by different vascular properties such as primary motor cortex

522 (Huber et al., 2017), primary somatosensory cortex (Shih et al., 2013; Silva et al.,

523 2002), dorsolateral-prefrontal cortex (Finn et al., 2019), which are currently under

524 active investigation using laminar fMRI to help to understand the vascular and neural

525 signal contributions.

526 In summary, we acquired BOLD and VASO laminar responses in human V1 at 7T,

527 and simulated these responses using the cortical vascular model. By fitting the model

528 to our experimental results, we obtained an estimate of CBV change in vascular

529 compartments upon neural activity. Our simulation results show that stimulus evoked

530 CBV change is dominant in small arterioles and capillaries and the contribution of

531 venules in total CBV change is small. Our results also suggest that the large vessel

532 bias in BOLD contrast is more prominent compared with VASO, as the BOLD signal

533 relationship with the oxygenation change is exponential, but VASO depends on the  
534 CBV change linearly.

## 535 **6 Declaration of interests**

536 None.

## 537 **7 Acknowledgement**

538 We acknowledge the helpful discussions with and support from Laurentius (Renzo)  
539 Huber, Jonathon Polimeni, and Irati Markuerkiaga. We thank Aiman Al-Najjar and  
540 Nicole Atcheson for help with data collection. This work was supported by the NHMRC  
541 (grant APP1117020) and the NIH (grant R01-MH111419). MB acknowledges funding  
542 from ARC Future Fellowship grant FT140100865. AA acknowledges support through  
543 the University of Queensland Research Training Program Scholarship. We also  
544 acknowledge the facilities and scientific and technical assistance of the National  
545 Imaging Facility (NIF), a National Collaborative Research Infrastructure Strategy  
546 (NCRIS) at the Centre for Advanced Imaging, the University of Queensland.

547

## 548 8 References

- 549 Aguirre, G.K., Zarahn, E., D'Esposito, M.J.N., 1998. The variability of human, BOLD  
550 hemodynamic responses. 8, 360-369.
- 551 Akbari, A., Bollmann, S., Ali, T., Barth, M., 2020. Modelling the Laminar VASO Signal  
552 Change in Human V1 at 7T. 28th Annual Meeting of the International Society for  
553 Magnetic Resonance Imaging in Medicine.
- 554 Barrett, M.J., Tawhai, M.H., Suresh, V.J.N., 2012. Arteries dominate volume changes  
555 during brief functional hyperemia: evidence from mathematical modelling. 62, 482-  
556 492.
- 557 Beckett, A.J., Dadakova, T., Townsend, J., Huber, L., Park, S., Feinberg, D.A.J.b.,  
558 2019. Comparison of BOLD and CBV using 3D EPI and 3D GRASE for cortical layer  
559 fMRI at 7T. 778142.
- 560 Blockley, N., Jiang, L., Gardener, A., Ludman, C., Francis, S., Gowland,  
561 P.J.M.R.i.M.A.O.J.o.t.I.S.f.M.R.i.M., 2008. Field strength dependence of R1 and R  
562 relaxivities of human whole blood to prohaance, vasovist, and deoxyhemoglobin. 60,  
563 1313-1320.
- 564 Boas, D.A., Jones, S.R., Devor, A., Huppert, T.J., Dale, A.M., 2008. A vascular  
565 anatomical network model of the spatio-temporal response to brain activation.  
566 Neuroimage 40, 1116-1129.
- 567 Buxton, R.B., 2009. Introduction to functional magnetic resonance imaging: principles  
568 and techniques. Cambridge university press.
- 569 Buxton, R.B., Uludağ, K., Dubowitz, D.J., Liu, T.T., 2004. Modeling the hemodynamic  
570 response to brain activation. Neuroimage 23, S220-S233.
- 571 Buxton, R.B., Wong, E.C., Frank, L.R.J.M.r.i.m., 1998. Dynamics of blood flow and  
572 oxygenation changes during brain activation: the balloon model. 39, 855-864.
- 573 Chai, Y., Li, L., Huber, L., Poser, B.A., Bandettini, P.A.J.N., 2019. Integrated VASO  
574 and perfusion contrast: A new tool for laminar functional MRI. 116358.
- 575 Chen, G., Wang, F., Gore, J.C., Roe, A.W.J.N., 2013. Layer-specific BOLD activation  
576 in awake monkey V1 revealed by ultra-high spatial resolution functional magnetic  
577 resonance imaging. 64, 147-155.
- 578 Dobre, M.C., Uğurbil, K., Marjanska, M.J.M.r.i., 2007. Determination of blood  
579 longitudinal relaxation time (T1) at high magnetic field strengths. 25, 733-735.
- 580 Douglas, R.J., Martin, K.A., 2004. Neuronal circuits of the neocortex. Annu. Rev.  
581 Neurosci. 27, 419-451.
- 582 Drew, P.J., Shih, A.Y., Kleinfeld, D.J.P.o.t.N.A.o.S., 2011. Fluctuating and sensory-  
583 induced vasodynamics in rodent cortex extend arteriole capacity. 108, 8473-8478.
- 584 Duann, J.-R., Jung, T.-P., Kuo, W.-J., Yeh, T.-C., Makeig, S., Hsieh, J.-C., Sejnowski,  
585 T.J.J.N., 2002. Single-trial variability in event-related BOLD signals. 15, 823-835.
- 586 Duvernoy, H.M., Delon, S., Vannson, J.J.B.r.b., 1981. Cortical blood vessels of the  
587 human brain. 7, 519-579.
- 588 Finn, E.S., Huber, L., Jangraw, D.C., Molfese, P.J., Bandettini, P.A.J.N.n., 2019.  
589 Layer-dependent activity in human prefrontal cortex during working memory. 22,  
590 1687-1695.
- 591 Francis, C., Frederic, L., Sylvie, L., Prasanna, P., Henri, D.J.M., 2009. Scaling laws  
592 for branching vessels of human cerebral cortex. 16, 331-344.
- 593 Gagnon, L., Sakadžić, S., Lesage, F., Musacchia, J.J., Lefebvre, J., Fang, Q., Yücel,  
594 M.A., Evans, K.C., Mandeville, E.T., Cohen-Adad, J.J.J.o.N., 2015. Quantifying the

595 microvascular origin of BOLD-fMRI from first principles with two-photon microscopy  
596 and an oxygen-sensitive nanoprobe. 35, 3663-3675.  
597 Gao, Y.-R., Greene, S.E., Drew, P.J.J.N., 2015. Mechanical restriction of intracortical  
598 vessel dilation by brain tissue sculpts the hemodynamic response. 115, 162-176.  
599 Genois, É., Gagnon, L., Desjardins, M.J.M.R.i.M., 2020. Modeling of vascular space  
600 occupancy and BOLD functional MRI from first principles using real microvascular  
601 angiograms. 85, 456-468.  
602 Goense, J., Merkle, H., Logothetis, N.K., 2012. High-resolution fMRI reveals laminar  
603 differences in neurovascular coupling between positive and negative BOLD  
604 responses. *Neuron* 76, 629-639.  
605 Goense, J.B., Logothetis, N.K., 2006. Laminar specificity in monkey V1 using high-  
606 resolution SE-fMRI. *Magnetic resonance imaging* 24, 381-392.  
607 Griffeth, V.E., Simon, A.B., Buxton, R.B.J.N., 2015. The coupling of cerebral blood  
608 flow and oxygen metabolism with brain activation is similar for simple and complex  
609 stimuli in human primary visual cortex. 104, 156-162.  
610 Griswold, M.A., Jakob, P.M., Heidemann, R.M., Nittka, M., Jellus, V., Wang, J., Kiefer,  
611 B., Haase, A.J.M.R.i.M.A.O.J.o.t.I.S.f.M.R.i.M., 2002. Generalized autocalibrating  
612 partially parallel acquisitions (GRAPPA). 47, 1202-1210.  
613 Grubb, R.L., Raichle, M.E., Eichling, J.O., Ter-Pogossian, M.M., 1974. The effects of  
614 changes in PaCO<sub>2</sub> cerebral blood volume, blood flow, and vascular mean transit time.  
615 *Stroke* 5, 630-639.  
616 Handwerker, D.A., Ollinger, J.M., D'Esposito, M.J.N., 2004. Variation of BOLD  
617 hemodynamic responses across subjects and brain regions and their effects on  
618 statistical analyses. 21, 1639-1651.  
619 Havlicek, M., Uludag, K.J.B., 2019. A dynamical model of the laminar BOLD response.  
620 609099.  
621 Heinzle, J., Koopmans, P.J., den Ouden, H.E., Raman, S., Stephan, K.E.J.N., 2016.  
622 A hemodynamic model for layered BOLD signals. 125, 556-570.  
623 Hua, J., Liu, P., Kim, T., Donahue, M., Rane, S., Chen, J.J., Qin, Q., Kim, S.-G.J.N.,  
624 2019. MRI techniques to measure arterial and venous cerebral blood volume. 187,  
625 17-31.  
626 Hua, J., Qin, Q., Donahue, M.J., Zhou, J., Pekar, J.J., van Zijl, P., 2011. Inflow-based  
627 vascular-space-occupancy (iVASO) MRI. *Magnetic resonance in medicine* 66, 40-56.  
628 Huber, L., 2011. Magnetic resonance imaging method for measuring functional  
629 cerebral blood volume changes at 7 Tesla. *Methods and Development Unit Nuclear*  
630 *Magnetic Resonance, MPI for Human ....*  
631 Huber, L., 2014. *Mapping Human Brain Activity by Functional Magnetic Resonance*  
632 *Imaging of Blood Volume.*  
633 Huber, L., Goense, J., Ivanov, D., Krieger, S., Turner, R., Moeller, H.E., 2013. Cerebral  
634 blood volume changes in negative BOLD regions during visual stimulation in humans  
635 at 7T. 21st Annual Meeting of the International Society for Magnetic Resonance in  
636 *Medicine.*  
637 Huber, L., Goense, J., Kennerley, A.J., Trampel, R., Guidi, M., Reimer, E., Ivanov, D.,  
638 Neef, N., Gauthier, C.J., Turner, R., 2015. Cortical lamina-dependent blood volume  
639 changes in human brain at 7 T. *Neuroimage* 107, 23-33.  
640 Huber, L., Handwerker, D.A., Jangraw, D.C., Chen, G., Hall, A., Stüber, C., Gonzalez-  
641 Castillo, J., Ivanov, D., Marrett, S., Guidi, M., 2017. High-resolution CBV-fMRI allows  
642 mapping of laminar activity and connectivity of cortical input and output in human M1.  
643 *Neuron* 96, 1253-1263. e1257.

- 644 Huber, L., Ivanov, D., Handwerker, D.A., Marrett, S., Guidi, M., Uludağ, K., Bandettini,  
645 P.A., Poser, B.A., 2016. Techniques for blood volume fMRI with VASO: from low-  
646 resolution mapping towards sub-millimeter layer-dependent applications.  
647 Neuroimage.
- 648 Huber, L., Ivanov, D., Krieger, S.N., Streicher, M.N., Mildner, T., Poser, B.A., Möller,  
649 H.E., Turner, R., 2014. Slab-selective, BOLD-corrected VASO at 7 Tesla provides  
650 measures of cerebral blood volume reactivity with high signal-to-noise ratio. *Magnetic*  
651 *resonance in medicine* 72, 137-148.
- 652 Huber, L.R., Poser, B.A., Bandettini, P.A., Arora, K., Wagstyl, K., Cho, S., Goense, J.,  
653 Nothnagel, N., Morgan, A.T., Van Den Hurk, J.J.B., 2020. LAYNII: A software suite for  
654 layer-fMRI.
- 655 Jahanian, H., Peltier, S., Noll, D.C., Hernandez Garcia, L.J.M.R.i.M., 2015. Arterial  
656 cerebral blood volume-weighted functional MRI using pseudocontinuous arterial spin  
657 tagging (AVAST). 73, 1053-1064.
- 658 Jin, T., Kim, S.-G., 2006. Spatial dependence of CBV-fMRI: a comparison between  
659 VASO and contrast agent based methods. 2006 International Conference of the IEEE  
660 Engineering in Medicine and Biology Society. IEEE, pp. 25-28.
- 661 Jin, T., Kim, S.-G., 2008a. Improved cortical-layer specificity of vascular space  
662 occupancy fMRI with slab inversion relative to spin-echo BOLD at 9.4 T. *Neuroimage*  
663 40, 59-67.
- 664 Jin, T., Kim, S.-G.J.N., 2008b. Cortical layer-dependent dynamic blood oxygenation,  
665 cerebral blood flow and cerebral blood volume responses during visual stimulation.  
666 43, 1-9.
- 667 Kashyap, S., Ivanov, D., Havlicek, M., Poser, B., Uludag, K., 2016. High-resolution T1-  
668 mapping using inversion-recovery EPI and application to cortical depth-dependent  
669 fMRI at 7 Tesla. Proceedings of the 24th Annual Meeting of ISMRM, Singapore.
- 670 Kim, S.G., Hendrich, K., Hu, X., Merkle, H., Uğurbil, K.J.N.i.B., 1994. Potential pitfalls  
671 of functional MRI using conventional gradient-recalled echo techniques. 7, 69-74.
- 672 Kim, T., Hendrich, K.S., Masamoto, K., Kim, S.-G.J.J.o.C.B.F., *Metabolism*, 2007.  
673 Arterial versus total blood volume changes during neural activity-induced cerebral  
674 blood flow change: implication for BOLD fMRI. 27, 1235-1247.
- 675 Kim, T., Kim, S.-G., 2010. Cortical layer-dependent arterial blood volume changes:  
676 improved spatial specificity relative to BOLD fMRI. *Neuroimage* 49, 1340-1349.
- 677 Kim, T., Kim, S.-G.J.J.o.C.B.F., *Metabolism*, 2011a. Temporal dynamics and spatial  
678 specificity of arterial and venous blood volume changes during visual stimulation:  
679 implication for BOLD quantification. 31, 1211-1222.
- 680 Kim, T., Kim, S.-G.J.T.o.n.j., 2011b. Suppl 1: Quantitative MRI of Cerebral Arterial  
681 Blood Volume. 5, 136.
- 682 Koopmans, P.J., Barth, M., Norris, D.G., 2010. Layer-specific BOLD activation in  
683 human V1. *Human brain mapping* 31, 1297-1304.
- 684 Koopmans, P.J., Barth, M., Orzada, S., Norris, D.G.J.N., 2011. Multi-echo fMRI of the  
685 cortical laminae in humans at 7 T. 56, 1276-1285.
- 686 Lauwers, F., Cassot, F., Lauwers-Cances, V., Puwanarajah, P., Duvernoy, H.J.N.,  
687 2008. Morphometry of the human cerebral cortex microcirculation: general  
688 characteristics and space-related profiles. 39, 936-948.
- 689 Lawrence, S.J., Norris, D.G., De Lange, F.P.J.E., 2019. Dissociable laminar profiles  
690 of concurrent bottom-up and top-down modulation in the human visual cortex. 8,  
691 e44422.
- 692 Light, K.C., Turner, J.R., Hinderliter, A.L., Sherwood, A.J.H.P., 1993. Race and gender  
693 comparisons: I. Hemodynamic responses to a series of stressors. 12, 354.

694 Lu, H., Golay, X., Pekar, J.J., van Zijl, P., 2003. Functional magnetic resonance  
695 imaging based on changes in vascular space occupancy. *Magnetic resonance in*  
696 *medicine* 50, 263-274.

697 Ma, Y., Shaik, M.A., Kim, S.H., Kozberg, M.G., Thibodeaux, D.N., Zhao, H.T., Yu, H.,  
698 Hillman, E.M.J.P.T.o.t.R.S.B.B.S., 2016. Wide-field optical mapping of neural activity  
699 and brain haemodynamics: considerations and novel approaches. 371, 20150360.

700 Markuerkiaga, I., Barth, M., Norris, D.G., 2016. A cortical vascular model for examining  
701 the specificity of the laminar BOLD signal. *Neuroimage* 132, 491-498.

702 Marques, J.P., Kober, T., Krueger, G., van der Zwaag, W., Van de Moortele, P.-F.,  
703 Gruetter, R.J.N., 2010. MP2RAGE, a self bias-field corrected sequence for improved  
704 segmentation and T1-mapping at high field. 49, 1271-1281.

705 O'Brien, K.R., Magill, A.W., Delacoste, J., Marques, J.P., Kober, T., Fautz, H.P.,  
706 Lazeyras, F., Krueger, G.J.J.o.M.R.I., 2014. Dielectric pads and low-adiabatic pulses:  
707 Complementary techniques to optimize structural T1w whole-brain MP2RAGE scans  
708 at 7 tesla. 40, 804-812.

709 Obata, T., Liu, T.T., Miller, K.L., Luh, W.-M., Wong, E.C., Frank, L.R., Buxton, R.B.J.N.,  
710 2004. Discrepancies between BOLD and flow dynamics in primary and supplementary  
711 motor areas: application of the balloon model to the interpretation of BOLD transients.  
712 21, 144-153.

713 Ogawa, S., Lee, T.M., Nayak, A.S., Glynn, P., 1990. Oxygenation-sensitive contrast  
714 in magnetic resonance image of rodent brain at high magnetic fields. *Magnetic*  
715 *resonance in medicine* 14, 68-78.

716 Olman, C.A., Harel, N., Feinberg, D.A., He, S., Zhang, P., Ugurbil, K., Yacoub, E.,  
717 2012. Layer-specific fMRI reflects different neuronal computations at different depths  
718 in human V1. *PLoS one* 7, e32536.

719 Petridou, N., Siero, J.C.J.N., 2017. Laminar fMRI: What can the time domain tell us?  
720 Polimeni, J.R., Fischl, B., Greve, D.N., Wald, L.L.J.N., 2010. Laminar analysis of 7 T  
721 BOLD using an imposed spatial activation pattern in human V1. 52, 1334-1346.

722 Polimeni, J.R., Hinds, O.P., Balasubramanian, M., van der Kouwe, A., Wald, L.L.,  
723 Dale, A.M., Fischl, B., Schwartz, E.L., 2005. The human V1–V2–V3 visuotopic map  
724 complex measured via fMRI at 3 and 7 Tesla.

725 Polimeni, J.R., Renvall, V., Zaretskaya, N., Fischl, B.J.N., 2018. Analysis strategies  
726 for high-resolution UHF-fMRI data. 168, 296-320.

727 Poplawsky, A.J., Fukuda, M., Murphy, M., Kim, S.-G.J.J.o.N., 2015. Layer-specific  
728 fMRI responses to excitatory and inhibitory neuronal activities in the olfactory bulb.  
729 35, 15263-15275.

730 Poplawsky, A.J., Kim, S.-G.J.N., 2014. Layer-dependent BOLD and CBV-weighted  
731 fMRI responses in the rat olfactory bulb. 91, 237-251.

732 Poser, B.A., Koopmans, P.J., Witzel, T., Wald, L.L., Barth, M., 2010. Three  
733 dimensional echo-planar imaging at 7 Tesla. *Neuroimage* 51, 261-266.

734 Ress, D., Glover, G.H., Liu, J., Wandell, B.J.n., 2007. Laminar profiles of functional  
735 activity in the human brain. 34, 74-84.

736 Schmid, F., Barrett, M.J., Jenny, P., Weber, B.J.N., 2017. Vascular density and  
737 distribution in neocortex.

738 Shih, Y.-Y.I., Chen, Y.-Y., Lai, H.-Y., Kao, Y.-C.J., Shyu, B.-C., Duong, T.Q.J.N., 2013.  
739 Ultra high-resolution fMRI and electrophysiology of the rat primary somatosensory  
740 cortex. 73, 113-120.

741 Silva, A.C., Koretsky, A.P.J.P.o.t.N.A.o.S., 2002. Laminar specificity of functional MRI  
742 onset times during somatosensory stimulation in rat. 99, 15182-15187.

743 Stephan, K., Petzschner, F., Kasper, L., Bayer, J., Wellstein, K., Stefanics, G.,  
744 Pruessmann, K., Heinzle, J., 2017. Laminar fMRI and computational theories of brain  
745 function. *Neuroimage*.  
746 Turner, R.J.N., 2002. How much cortex can a vein drain? Downstream dilution of  
747 activation-related cerebral blood oxygenation changes. *16*, 1062-1067.  
748 Uludağ, K., Müller-Bierl, B., Uğurbil, K.J.N., 2009. An integrative model for neuronal  
749 activity-induced signal changes for gradient and spin echo functional imaging. *48*,  
750 150-165.  
751 Van Kerkoerle, T., Self, M.W., Roelfsema, P.R.J.N.c., 2017. Layer-specificity in the  
752 effects of attention and working memory on activity in primary visual cortex. *8*, 1-14.  
753 Vanzetta, I., Hildesheim, R., Grinvald, A.J.J.o.N., 2005. Compartment-resolved  
754 imaging of activity-dependent dynamics of cortical blood volume and oximetry. *25*,  
755 2233-2244.  
756 Vazquez, A.L., Fukuda, M., Kim, S.-G.J.J.o.C.B.F., *Metabolism*, 2012. Evolution of the  
757 dynamic changes in functional cerebral oxidative metabolism from tissue mitochondria  
758 to blood oxygen. *32*, 745-758.  
759 Waehnert, M., Dinse, J., Weiss, M., Streicher, M.N., Waehnert, P., Geyer, S., Turner,  
760 R., Bazin, P.-L.J.N., 2014. Anatomically motivated modeling of cortical laminae. *93*,  
761 210-220.  
762 Weber, B., Keller, A.L., Reichold, J., Logothetis, N.K., 2008. The microvascular system  
763 of the striate and extrastriate visual cortex of the macaque. *Cerebral cortex* *18*, 2318-  
764 2330.  
765 Yablonskiy, D.A., Haacke, E.M., 1994. Theory of NMR signal behavior in magnetically  
766 inhomogeneous tissues: the static dephasing regime. *Magnetic resonance in medicine*  
767 *32*, 749-763.  
768 Yu, X., Qian, C., Chen, D.-y., Dodd, S.J., Koretsky, A.P.J.N.m., 2014. Deciphering  
769 laminar-specific neural inputs with line-scanning fMRI. *11*, 55.  
770 Zhang, X., Petersen, E.T., Ghariq, E., De Vis, J., Webb, A., Teeuwisse, W.M.,  
771 Hendrikse, J., Van Osch, M.J.M.r.i.m., 2013. In vivo blood T1 measurements at 1.5 T,  
772 3 T, and 7 T. *70*, 1082-1086.  
773 Zhao, F., Wang, P., Hendrich, K., Ugurbil, K., Kim, S.-G.J.N., 2006. Cortical layer-  
774 dependent BOLD and CBV responses measured by spin-echo and gradient-echo  
775 fMRI: insights into hemodynamic regulation. *30*, 1149-1160.  
776 Zweifach, B.W., Lipowsky, H.H.J.C.r., 1977. Quantitative studies of microcirculatory  
777 structure and function. III. Microvascular hemodynamics of cat mesentery and rabbit  
778 omentum. *41*, 380-390.

779
